# Supplementary material for: Effect of Ball Weight on Speed, Accuracy, and Mechanics in Cricket Fast Bowling
Source: MDPI journal article supplement (doi:10.3390/sports5010018), 2017-02-28

BALL SPEED (AFTER)

Participant 1

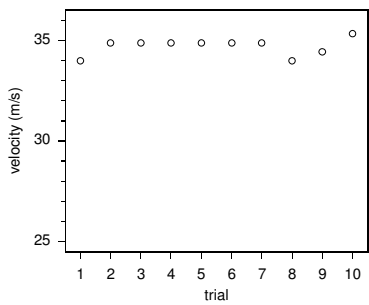

Participant 2

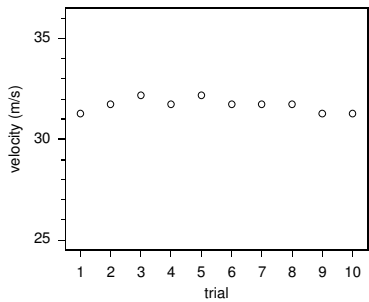

Participant 3

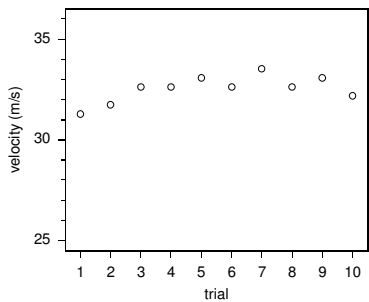

Participant 4

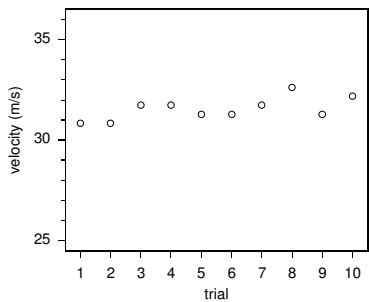

Participant 5

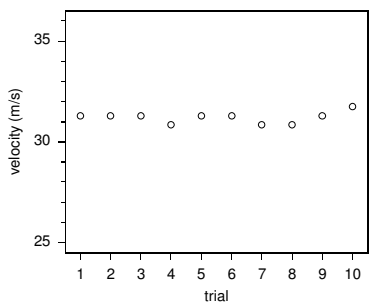

Participant 6

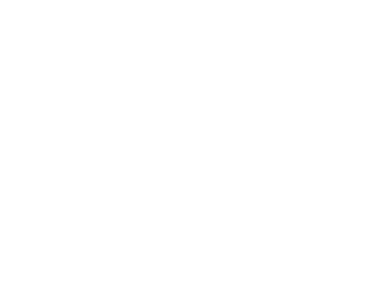

Participant 7

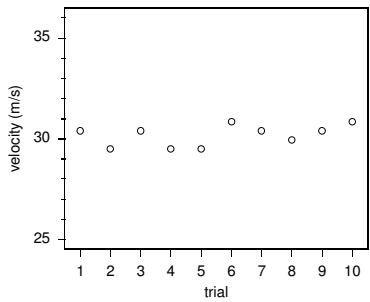

Participant 8

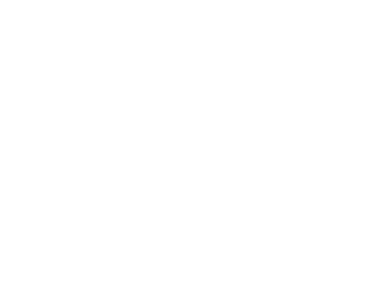

Participant 9

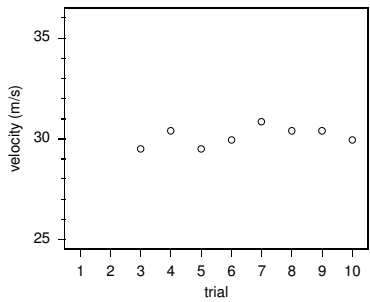

Participant 10

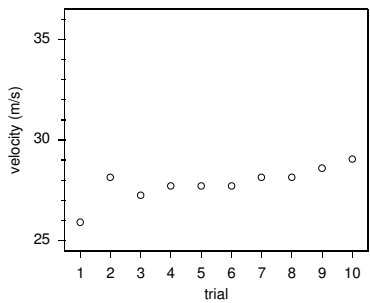

ACCURACY (AFTER)

Participant 1

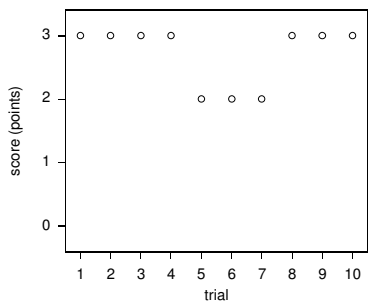

Participant 6

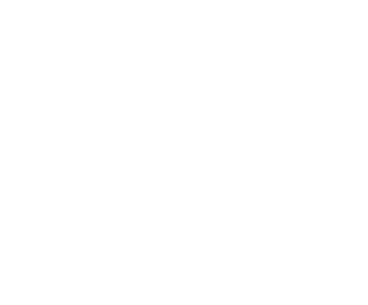

Participant 2

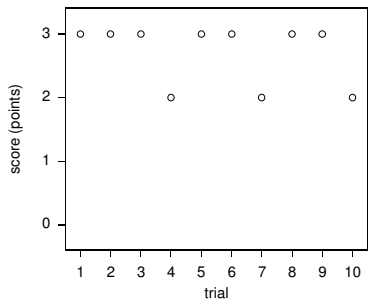

Participant 7

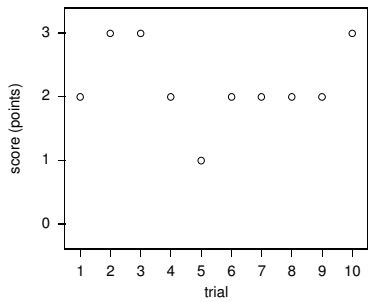

Participant 3

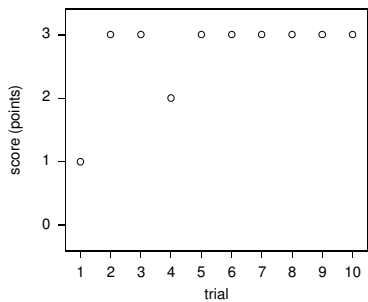

Participant 8

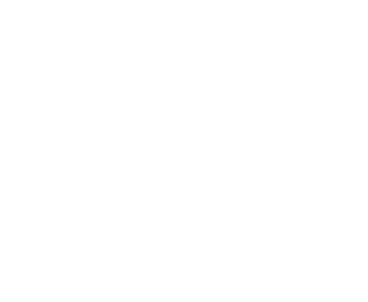

Participant 4

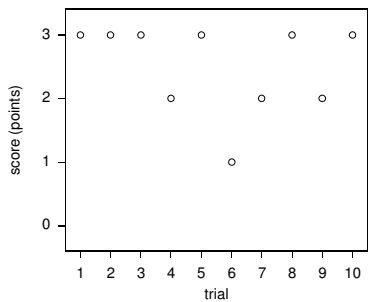

Participant 9

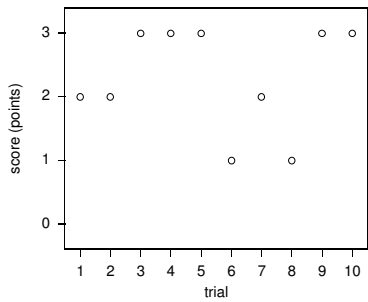

Participant 5

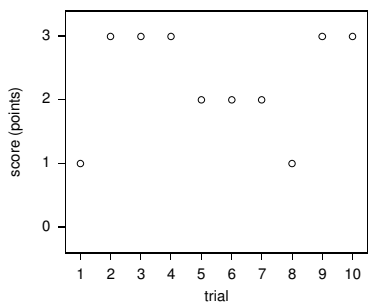

Participant 10

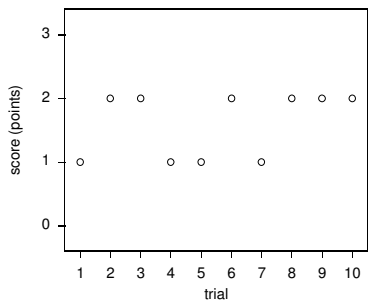

## BACK FOOT ANGLE (AFTER) \*

Participant 1

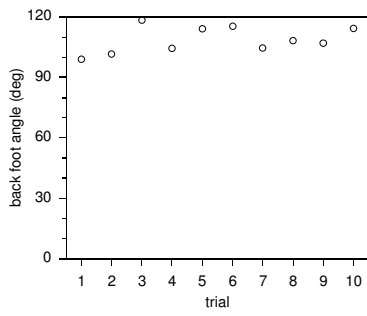

Participant 6

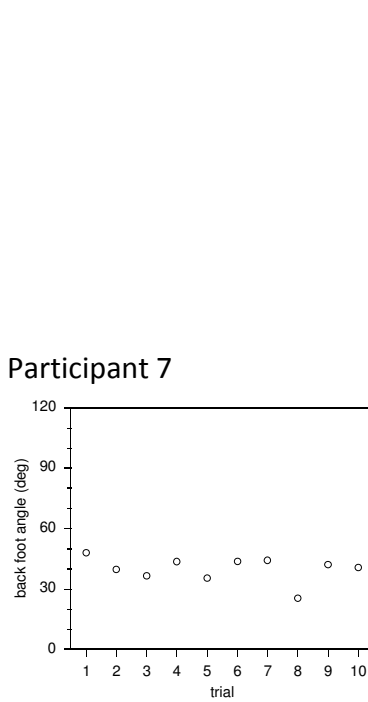

Participant 2

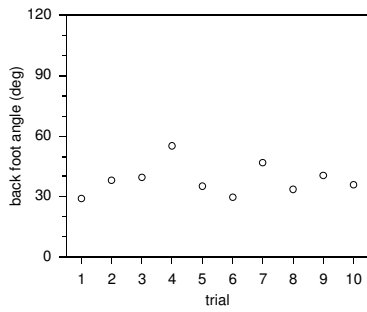

Participant 7

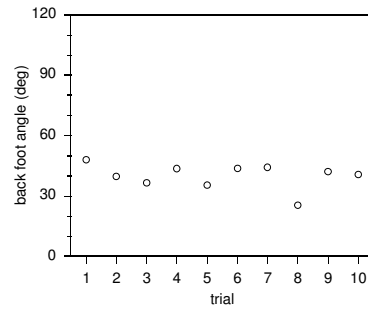

Participant 3

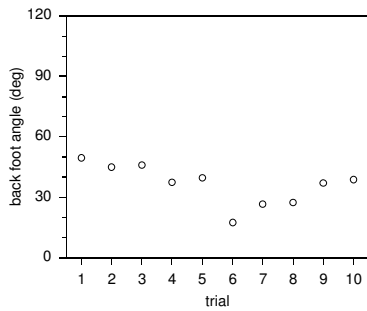

Participant 8

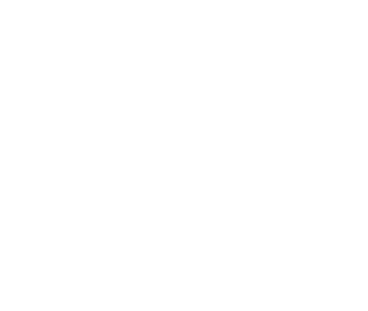

Participant 4

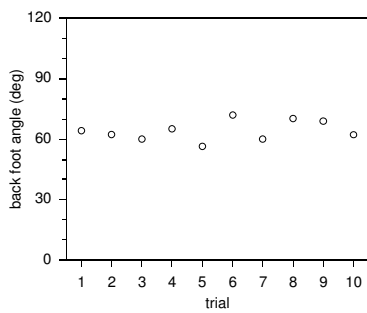

Participant 9

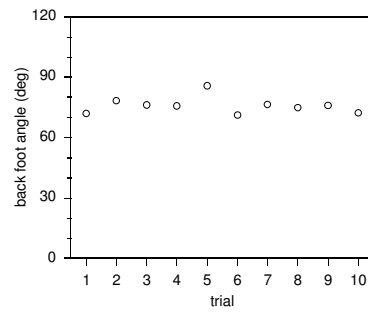

Participant 5

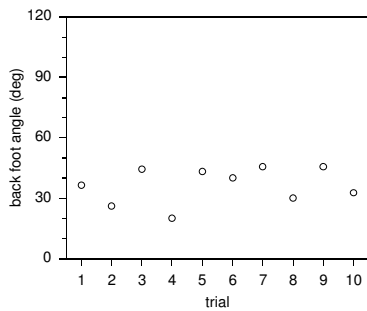

Participant 10

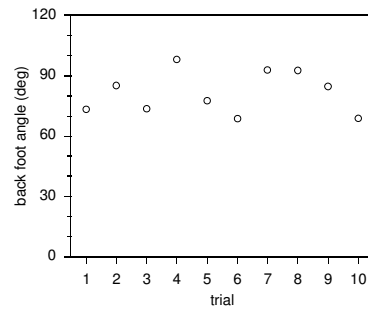

\* Foot angle measured in clockwise direction relative to direction of run-up

FRONT FOOT ANGLE (AFTER) \*

Participant 1

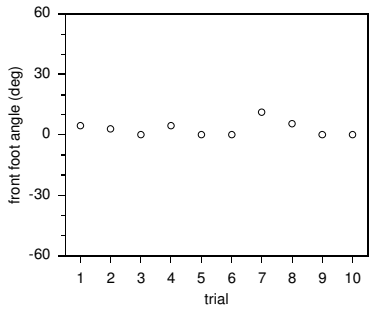

Participant 6

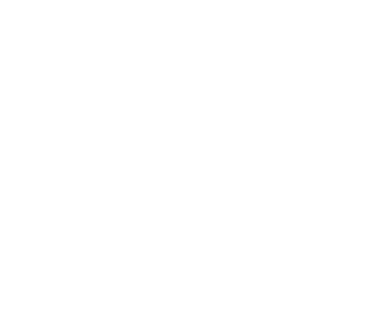

Participant 2

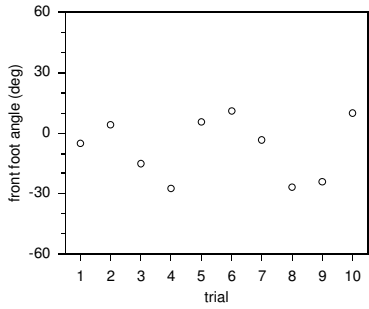

Participant 7

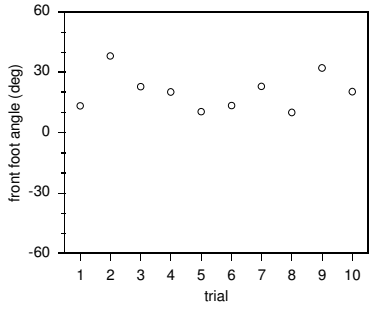

Participant 3

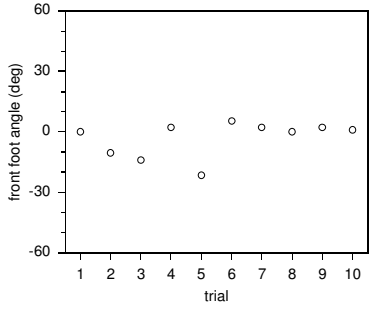

Participant 8



Participant 4

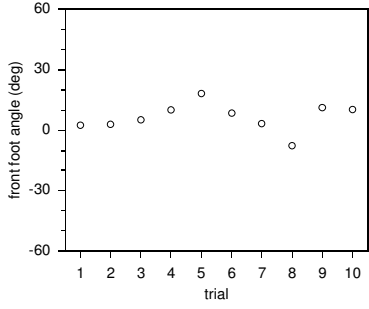

Participant 9

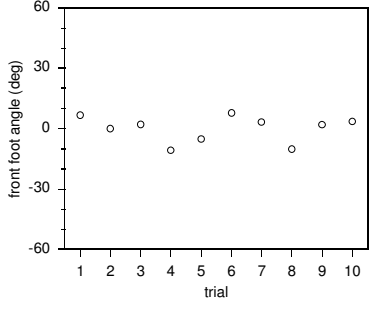

Participant 5

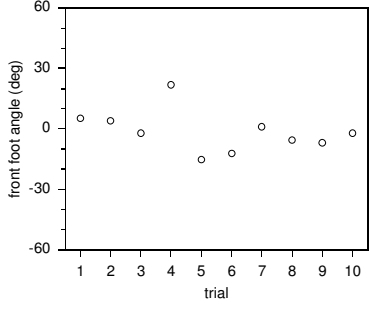

Participant 10

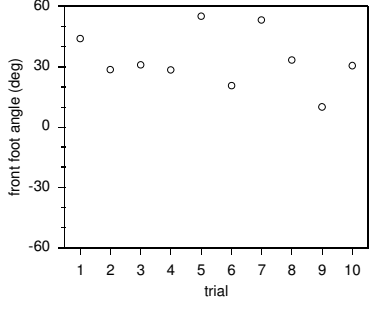

\* Foot angle measured in clockwise direction relative to direction of run-up

KNEE ANGLE (BACK FOOT CONTACT) (AFTER)

Participant 1

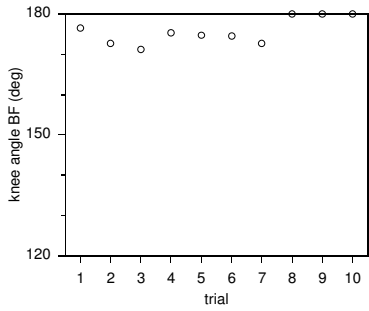

Participant 6

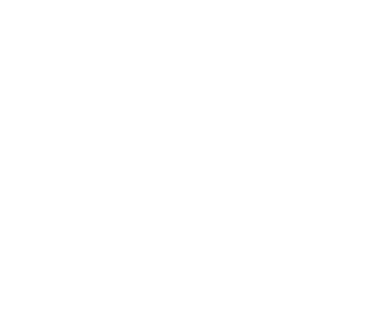

Participant 2

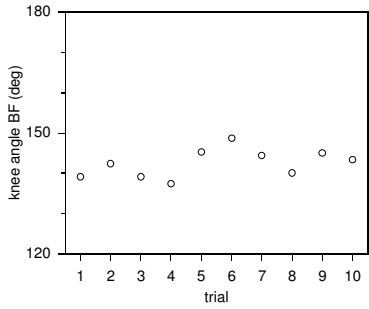

Participant 7

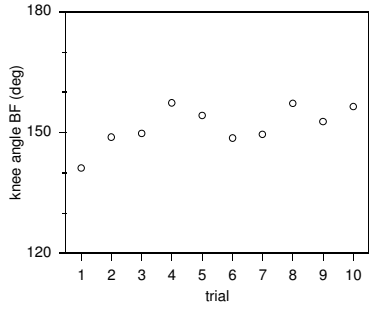

Participant 3

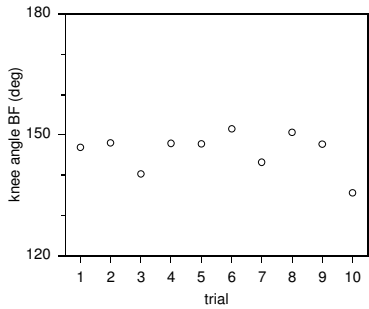

Participant 8

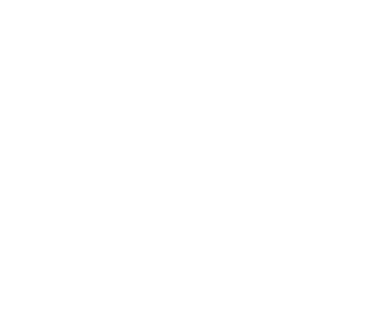

Participant 4

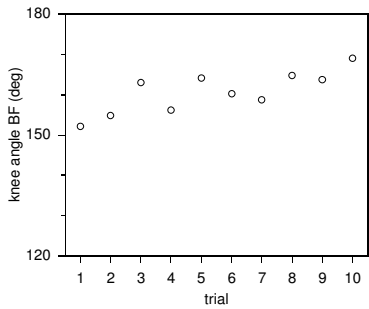

Participant 9

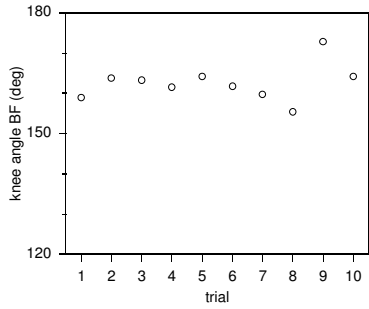

Participant 5

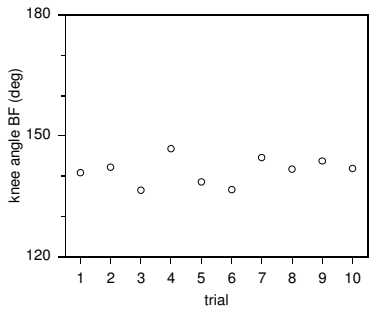

Participant 10

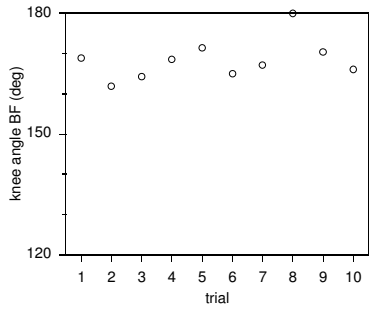

KNEE ANGLE (FRONT FOOT CONTACT) (AFTER)

Participant 1

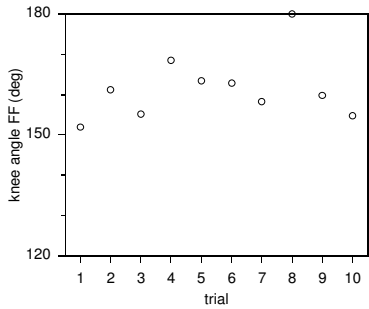

Participant 6



Participant 2

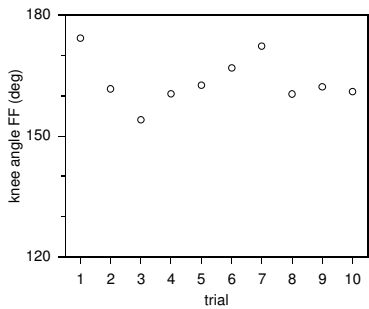

Participant 7

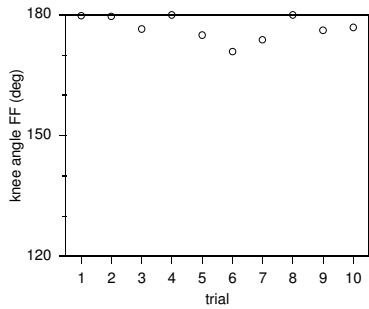

Participant 3

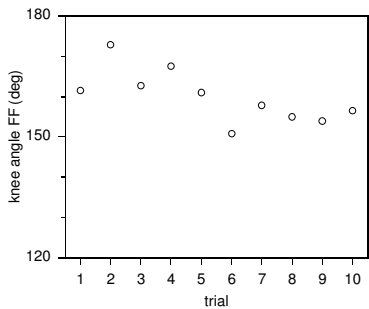

Participant 8



Participant 4

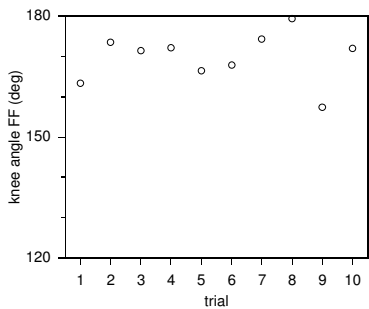

Participant 9

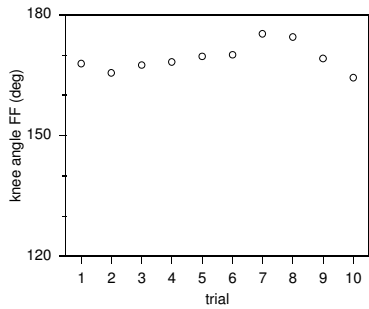

Participant 5

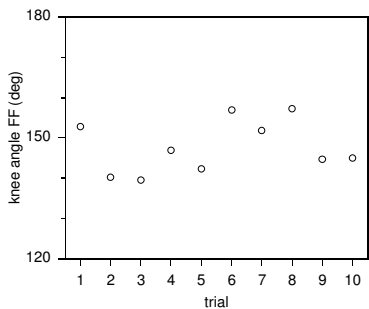

Participant 10

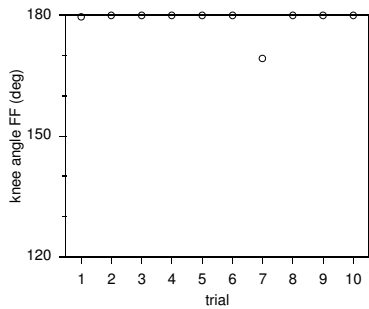

KNEE ANGLE (RELEASE) (AFTER)

Participant 1

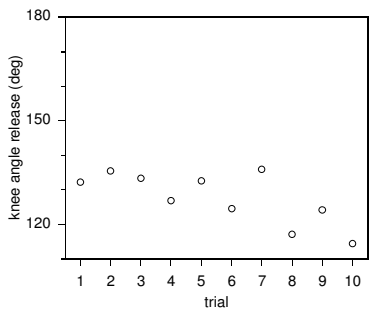

Participant 6

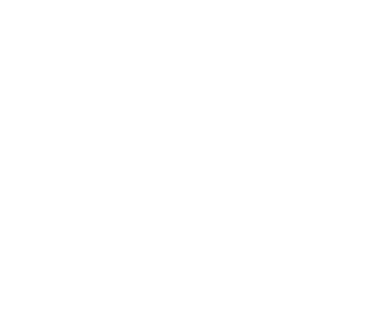

Participant 2

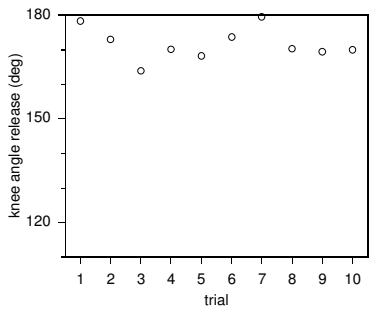

Participant 7

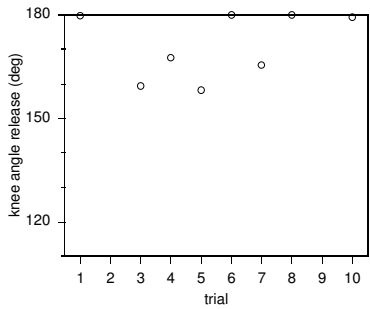

Participant 3

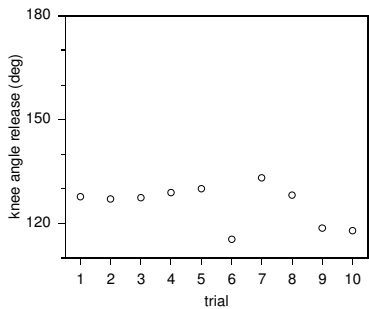

Participant 8



Participant 4

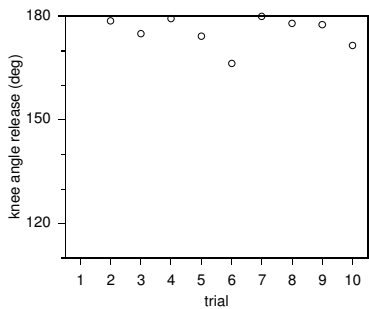

Participant 9

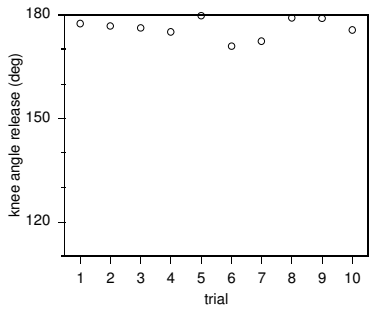

Participant 5

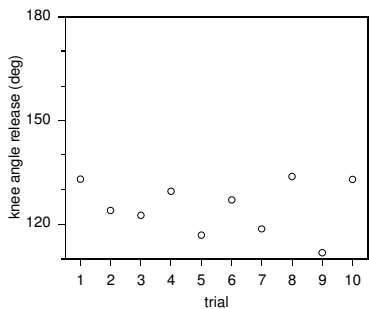

Participant 10

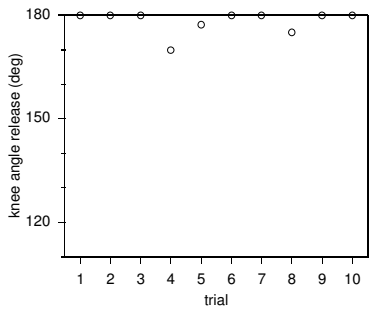

SHOULDER ANGLE X (BACK FOOT CONTACT) (AFTER)

Participant 1

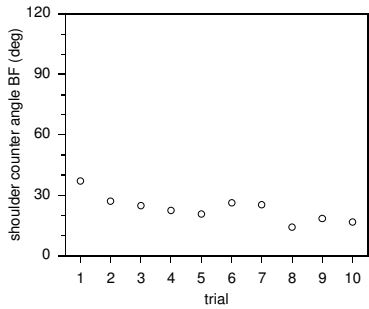

Participant 6

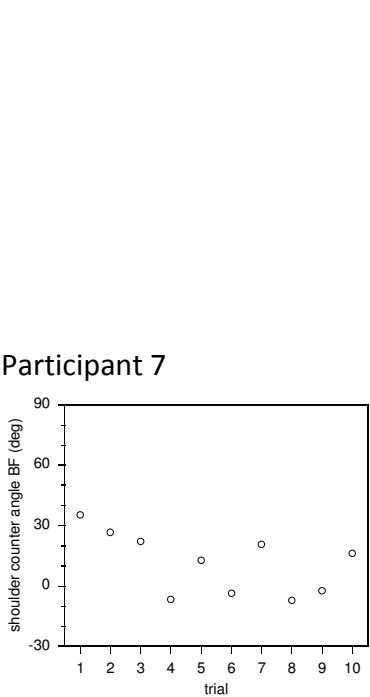

Participant 2

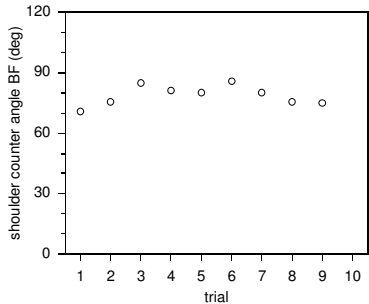

Participant 7

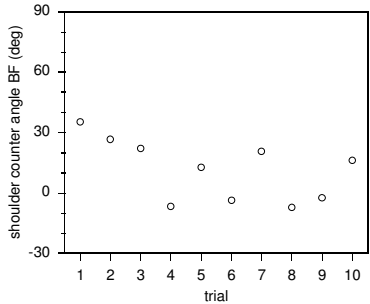

Participant 3

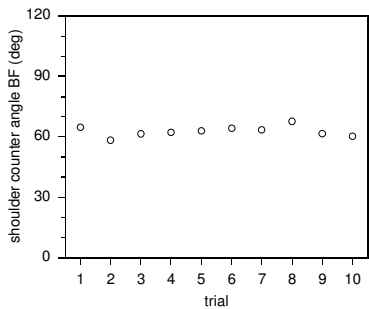

Participant 8

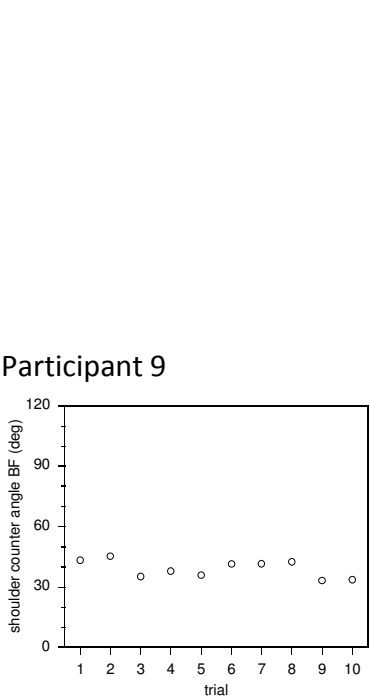

Participant 4

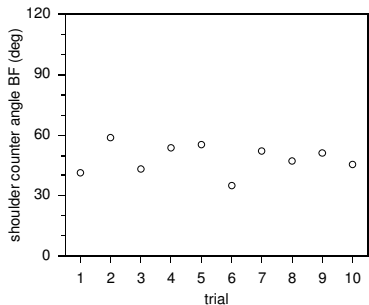

Participant 9

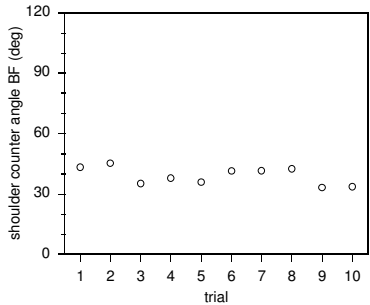

Participant 5

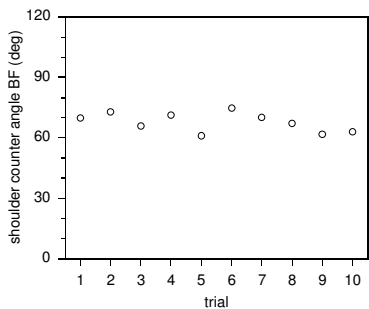

Participant 10

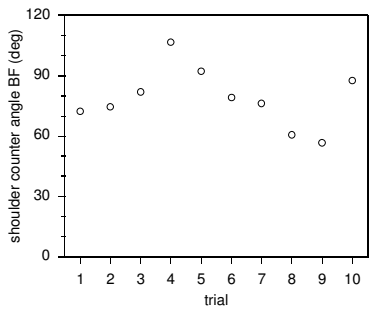



SHOULDER ANGLE X (FRONT FOOT CONTACT) (AFTER)

Participant 1

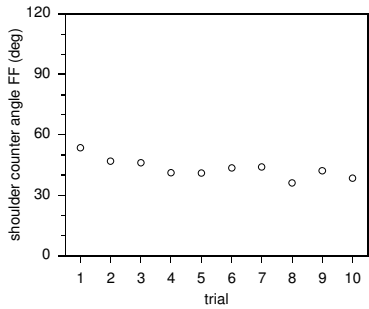

Participant 6



Participant 2

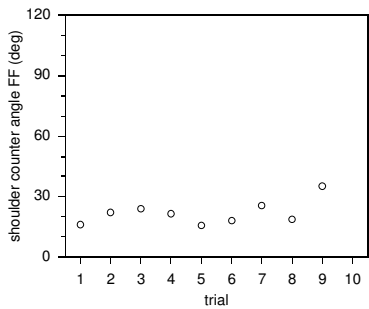

Participant 7

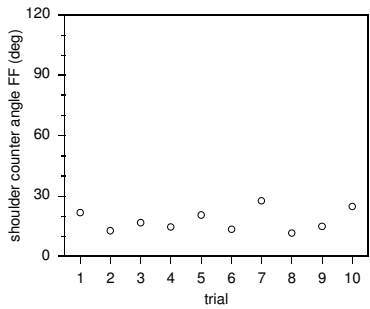

Participant 3

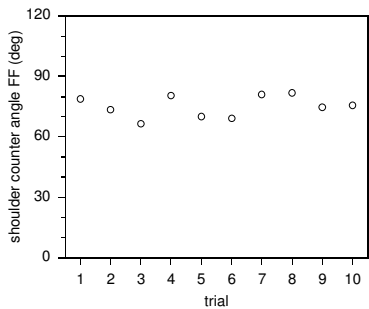

Participant 8



Participant 4

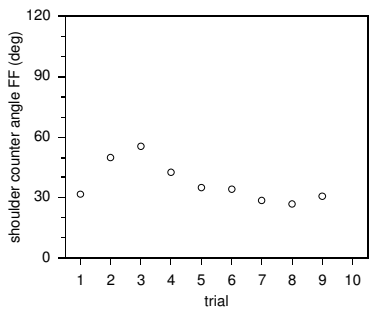

Participant 9

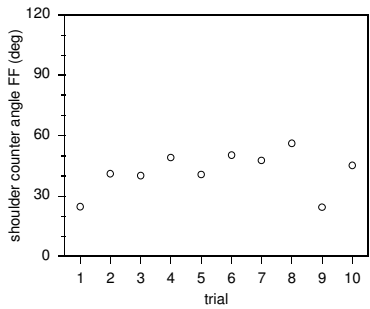

Participant 5

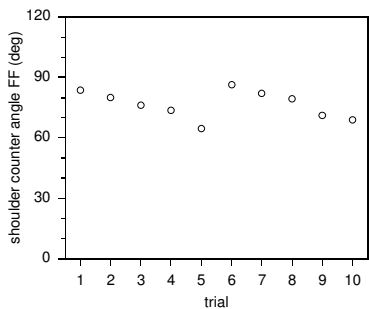

Participant 10

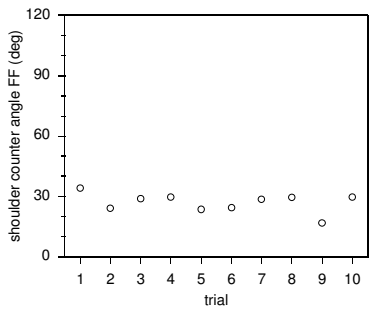

Supplement: s1 [file s1]
