# Supplementary material for: Effect of Ball Weight on Speed, Accuracy, and Mechanics in Cricket Fast Bowling
Source: MDPI journal article supplement (doi:10.3390/sports5010018), 2017-02-28
Supplement: s1 [file s1]

## EFFECT OF TRAINING PROGRAMS (INDIVIDUAL ANALYSIS)

### Ball Speed

| Training group | Participant | Before<br>(m/s) | After<br>(m/s) | Difference<br>(m/s) | ±90% CI<br>(m/s) | Interpretation      |
|----------------|-------------|-----------------|----------------|---------------------|------------------|---------------------|
| Intervention   | 1           | 32.6            | 34.7           | 2.1                 | 0.9              | Probably beneficial |
|                | 2           | 32.0            | 31.7           | -0.3                | 0.3              | Probably trivial    |
|                | 3           | 30.9            | 32.5           | 1.7                 | 0.5              | Probably beneficial |
|                | 4           | 30.8            | 31.6           | 0.8                 | 0.6              | Possibly trivial    |
|                | 5           | 30.6            | 31.2           | 0.6                 | 0.2              | Probably trivial    |
| Control        | 6           | 31.6            | —              | —                   | —                | —                   |
|                | 7           | 31.0            | 30.2           | -0.8                | 0.4              | Possibly trivial    |
|                | 8           | 29.5            | —              | —                   | —                | —                   |
|                | 9           | 28.9            | 29.6           | 0.8                 | 0.8              | Possibly trivial    |
|                | 10          | 27.3            | 27.9           | 0.6                 | 0.6              | Probably trivial    |

### Accuracy

| Training group | Participant | Before<br>(point) | After<br>(point) | Difference<br>(point) | ±90% CI<br>(point) | Interpretation              |
|----------------|-------------|-------------------|------------------|-----------------------|--------------------|-----------------------------|
| Intervention   | 1           | 1.5               | 2.7              | 1.2                   | 0.7                | Almost certainly beneficial |
|                | 2           | 2.0               | 2.7              | 0.7                   | 0.6                | Unclear                     |
|                | 3           | 1.7               | 2.7              | 1.0                   | 0.6                | Probably beneficial         |
|                | 4           | 1.8               | 2.5              | 0.7                   | 0.6                | Unclear                     |
|                | 5           | 1.6               | 2.3              | 0.7                   | 0.8                | Unclear                     |
| Control        | 6           | 2.5               | —                | —                     | —                  | —                           |
|                | 7           | 2.2               | 2.2              | 0.0                   | 0.5                | Unclear                     |
|                | 8           | 1.4               | —                | —                     | —                  | —                           |
|                | 9           | 1.9               | 2.3              | 0.4                   | 0.7                | Unclear                     |
|                | 10          | 1.8               | 1.6              | -0.2                  | 0.4                | Unclear                     |

## EFFECT OF TRAINING PROGRAMS (INDIVIDUAL ANALYSIS)

### Back Foot Angle

| Training group | Participant | Before (deg) | After (deg) | Difference (deg) | ±90% CI (deg) | Interpretation             |
|----------------|-------------|--------------|-------------|------------------|---------------|----------------------------|
| Intervention   | 1           | 106          | 109         | 3                | 5             | Probably trivial           |
|                | 2           | 40           | 38          | -2               | 7             | Probably trivial           |
|                | 3           | 34           | 36          | 2                | 7             | Probably trivial           |
|                | 4           | 73           | 64          | -9               | 4             | Probably trivial           |
|                | 5           | 59           | 36          | -23              | 8             | Possibly decreased         |
| Control        | 6           | 63           | —           | —                | —             | —                          |
|                | 7           | 73           | 40          | -33              | 7             | Almost certainly decreased |
|                | 8           | 35           | —           | —                | —             | —                          |
|                | 9           | 56           | 76          | 20               | 5             | Possibly trivial           |
|                | 10          | 103          | 82          | -22              | 8             | Possibly decreased         |

### Front Foot Angle

| Training group | Participant | Before (deg) | After (deg) | Difference (deg) | ±90% CI (deg) | Interpretation             |
|----------------|-------------|--------------|-------------|------------------|---------------|----------------------------|
| Intervention   | 1           | 15           | 3           | -12              | 3             | Possibly trivial           |
|                | 2           | -14          | -7          | 7                | 10            | Probably trivial           |
|                | 3           | 4            | -3          | -7               | 6             | Possibly trivial           |
|                | 4           | -5           | 6           | 12               | 5             | Possibly trivial           |
|                | 5           | -4           | -1          | 3                | 6             | Probably trivial           |
| Control        | 6           | 15           | —           | —                | —             | —                          |
|                | 7           | 5            | 20          | 16               | 6             | Probably trivial           |
|                | 8           | -7           | —           | —                | —             | —                          |
|                | 9           | 41           | 0           | -41              | 6             | Almost certainly decreased |
|                | 10          | 40           | 34          | -6               | 10            | Probably trivial           |

\* Foot angle measured in clockwise direction relative to direction of run-up

## EFFECT OF TRAINING PROGRAMS (INDIVIDUAL ANALYSIS)

### Knee Angle (Back Foot Contact)

| Training group | Participant | Before (deg) | After (deg) | Difference (deg) | ±90% CI (deg) | Interpretation     |
|----------------|-------------|--------------|-------------|------------------|---------------|--------------------|
| Intervention   | 1           | 174          | 176         | 1                | 3             | Probably trivial   |
|                | 2           | 147          | 143         | -4               | 4             | Possibly trivial   |
|                | 3           | 150          | 146         | -4               | 4             | Possibly trivial   |
|                | 4           | 163          | 161         | -3               | 4             | Probably trivial   |
|                | 5           | 142          | 141         | -1               | 3             | Probably trivial   |
| Control        | 6           | 155          | —           | —                | —             | —                  |
|                | 7           | 154          | 152         | -2               | 4             | Probably trivial   |
|                | 8           | 142          | —           | —                | —             | —                  |
|                | 9           | 149          | 163         | 14               | 5             | Probably increased |
|                | 10          | 166          | 168         | 3                | 4             | Probably trivial   |

### Knee Angle (Front Foot Contact)

| Training group | Participant | Before (deg) | After (deg) | Difference (deg) | ±90% CI (deg) | Interpretation             |
|----------------|-------------|--------------|-------------|------------------|---------------|----------------------------|
| Intervention   | 1           | 154          | 162         | 8                | 5             | Possibly trivial           |
|                | 2           | 159          | 164         | 5                | 5             | Possibly trivial           |
|                | 3           | 141          | 160         | 19               | 5             | Almost certainly increased |
|                | 4           | 164          | 170         | 6                | 5             | Possibly trivial           |
|                | 5           | 147          | 148         | 1                | 6             | Probably trivial           |
| Control        | 6           | 175          | —           | —                | —             | —                          |
|                | 7           | 162          | 177         | 15               | 3             | Probably increased         |
|                | 8           | 156          | —           | —                | —             | —                          |
|                | 9           | 177          | 169         | -8               | 3             | Possibly trivial           |
|                | 10          | 172          | 179         | 7                | 4             | Possibly trivial           |

### Knee Angle (Release)

| Training group | Participant | Before (deg) | After (deg) | Difference (deg) | ±90% CI (deg) | Interpretation   |
|----------------|-------------|--------------|-------------|------------------|---------------|------------------|
| Intervention   | 1           | 132          | 128         | -4               | 5             | Possibly trivial |
|                | 2           | 177          | 172         | -5               | 5             | Possibly trivial |
|                | 3           | 131          | 125         | -6               | 5             | Possibly trivial |
|                | 4           | 179          | 176         | -3               | 3             | Possibly trivial |
|                | 5           | 128          | 125         | -3               | 5             | Possibly trivial |
| Control        | 6           | 153          | —           | —                | —             | —                |
|                | 7           | 180          | 173         | -7               | 6             | Possibly trivial |
|                | 8           | 131          | —           | —                | —             | —                |
|                | 9           | 176          | 176         | 1                | 4             | Probably trivial |
|                | 10          | 180          | 178         | -2               | 2             | Possibly trivial |

## EFFECT OF TRAINING PROGRAMS (INDIVIDUAL ANALYSIS)

### Shoulder Angle (Back Foot Contact)

| Training group | Participant | Before (deg) | After (deg) | Difference (deg) | ±90% CI (deg) | Interpretation             |
|----------------|-------------|--------------|-------------|------------------|---------------|----------------------------|
| Intervention   | 1           | 37           | 23          | -14              | 5             | Possibly trivial           |
|                | 2           | 78           | 79          | 1                | 4             | Probably trivial           |
|                | 3           | 59           | 63          | 4                | 2             | Probably trivial           |
|                | 4           | 49           | 48          | 0                | 5             | Probably trivial           |
|                | 5           | 50           | 68          | 18               | 4             | Possibly trivial           |
| Control        | 6           | 32           | —           | —                | —             | —                          |
|                | 7           | 51           | 11          | -40              | 9             | Almost certainly decreased |
|                | 8           | —            | —           | —                | —             | —                          |
|                | 9           | 48           | 39          | -9               | 4             | Probably trivial           |
|                | 10          | 67           | 79          | 12               | 10            | Possibly trivial           |

### Shoulder Angle (Front Foot Contact)

| Training group | Participant | Before (deg) | After (deg) | Difference (deg) | ±90% CI (deg) | Interpretation             |
|----------------|-------------|--------------|-------------|------------------|---------------|----------------------------|
| Intervention   | 1           | 24           | 43          | 20               | 4             | Possibly trivial           |
|                | 2           | 17           | 22          | 5                | 5             | Probably trivial           |
|                | 3           | 73           | 75          | 2                | 4             | Probably trivial           |
|                | 4           | 17           | 37          | 20               | 7             | Possibly trivial           |
|                | 5           | 95           | 77          | -18              | 5             | Possibly trivial           |
| Control        | 6           | 10           | —           | —                | —             | —                          |
|                | 7           | 7            | 18          | 11               | 4             | Possibly trivial           |
|                | 8           | —            | —           | —                | —             | —                          |
|                | 9           | 6            | 42          | 36               | 7             | Almost certainly increased |
|                | 10          | 9            | 27          | 19               | 4             | Possibly trivial           |

\* Foot angle measured in anti-clockwise direction relative to direction of run-up

## EFFECT OF TRAINING PROGRAMS (GROUP ANALYSIS)

### Intervention (n=5)

| Variable                                     | Meaningful difference | Mean difference | ±90%CI | p-value | Cohen's <i>d</i> | Within-pair correlation | Interpretation              |
|----------------------------------------------|-----------------------|-----------------|--------|---------|------------------|-------------------------|-----------------------------|
| Ball speed (m/s)                             | 1.5                   | 0.99            | 0.87   | 0.07*   | 1.08             | 0.77                    | Possibly trivial            |
| Accuracy (points)                            | 0.1                   | 0.85            | 0.24   | <0.01*  | 3.38             | 0.21                    | Almost certainly beneficial |
| Back foot angle (deg)                        | 20                    | -5.7            | 10.1   | 0.30    | -0.53            | 0.94                    | Probably trivial            |
| Front foot angle (deg)                       | 20                    | 0.5             | 9.3    | 0.92    | 0.05             | 0.42                    | Probably trivial            |
| Back knee angle at back-foot contact (deg)   | 10                    | -2.0            | 2.3    | 0.13    | -0.85            | 0.99                    | Probably trivial            |
| Front knee angle at front-foot contact (deg) | 10                    | 7.8             | 6.5    | 0.06*   | 1.16             | 0.70                    | Possibly trivial            |
| Front knee angle at ball release (deg)       | 10                    | -4.2            | 1.2    | <0.01*  | -3.41            | 0.99                    | Very likely trivial         |
| Shoulder angle at back-foot contact (deg)    | 20                    | 1.6             | 10.7   | 0.77    | 0.14             | 0.86                    | Probably trivial            |
| Shoulder angle at front-foot contact (deg)   | 20                    | 5.6             | 14.8   | 0.46    | 0.36             | 0.94                    | Possibly trivial            |

### Control (n=3)

| Variable                                     | Meaningful difference | Mean difference | ±90%CI | p-value | Cohen's <i>d</i> | Within-pair correlation | Interpretation     |
|----------------------------------------------|-----------------------|-----------------|--------|---------|------------------|-------------------------|--------------------|
| Ball speed (m/s)                             | 1.5                   | 0.20            | 1.43   | 0.72    | 0.24             | 0.93                    | Possibly trivial   |
| Accuracy (points)                            | 0.1                   | 0.08            | 0.43   | 0.65    | 0.30             | 0.78                    | Unclear            |
| Back foot angle (deg)                        | 20                    | -11.5           | 19.4   | 0.55    | -0.42            | 0.30                    | Unclear            |
| Front foot angle (deg)                       | 20                    | -10.5           | 48.3   | 0.59    | -0.37            | -0.16                   | Unclear            |
| Back knee angle at back-foot contact (deg)   | 10                    | 4.9             | 14.0   | 0.42    | 0.59             | 0.53                    | Possibly trivial   |
| Front knee angle at front-foot contact (deg) | 10                    | 4.5             | 19.5   | 0.57    | 0.39             | -0.61                   | Unclear            |
| Front knee angle at ball release (deg)       | 10                    | -2.6            | 6.1    | 0.34    | -0.71            | -0.11                   | Probably trivial   |
| Shoulder angle at back-foot contact (deg)    | 20                    | -12.1           | 44.0   | 0.51    | -0.46            | 0.82                    | Unclear            |
| Shoulder angle at front-foot contact (deg)   | 20                    | 21.6            | 21.6   | 0.10    | 1.68             | -0.62                   | Possibly increased |

\* Statistically significant at  $\alpha = 0.10$
