# Supplementary material for: Effect of Ball Weight on Speed, Accuracy, and Mechanics in Cricket Fast Bowling
Source: MDPI journal article supplement (doi:10.3390/sports5010018), 2017-02-28
Supplement: s1 [file s1]

# BOWLING MODEL with fitted Shoulder Torque ( $m_{\text{arm}} = 5\% M$ ; $\Delta\theta = 270^\circ$ ; $v_{\text{run-up}} = 5 \text{ m/s}$ )

Participant 1

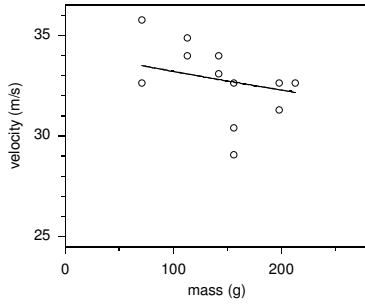

Participant 6

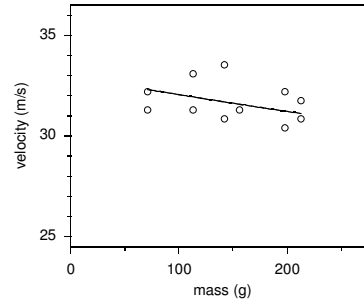

Participant 2

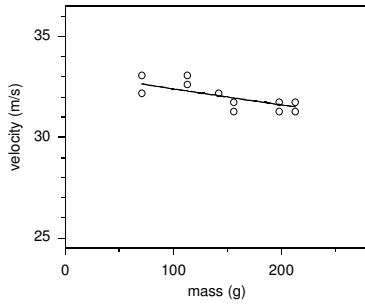

Participant 7

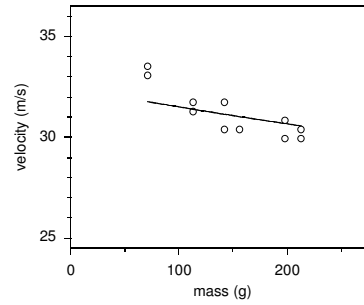

Participant 3

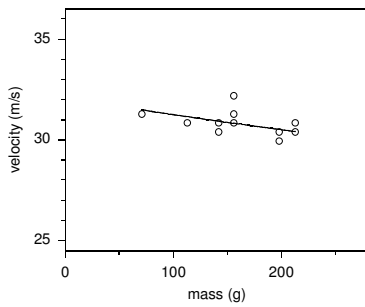

Participant 8

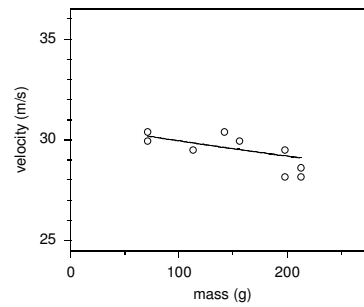

Participant 4

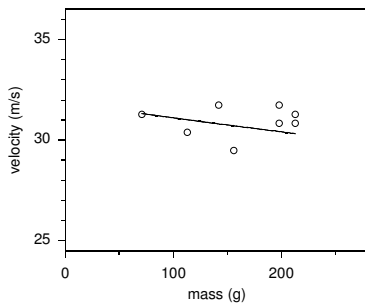

Participant 9

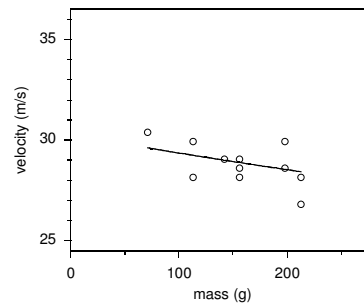

Participant 5

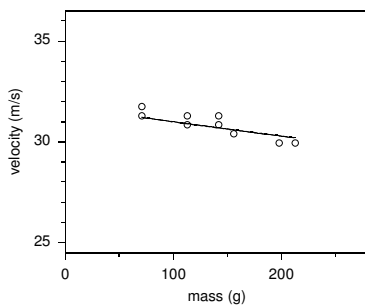

Participant 10

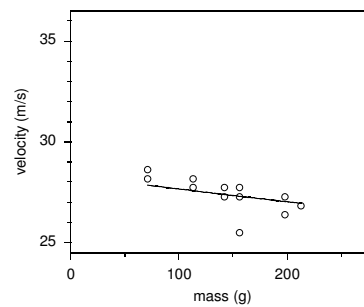

# BOWLING MODEL with fitted Shoulder Torque and Arm Mass ( $\Delta\theta = 270^\circ$ ; $v_{\text{run-up}} = 5 \text{ m/s}$ )

Participant 1

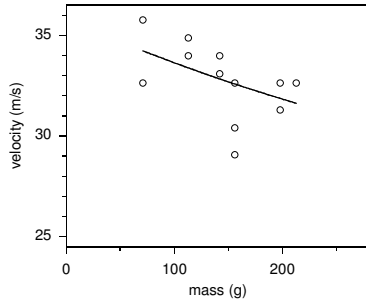

Participant 6

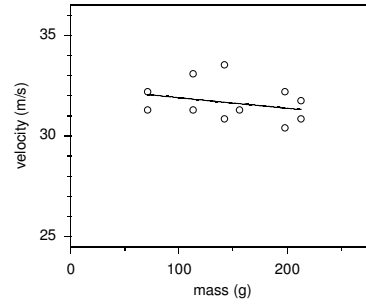

Participant 2

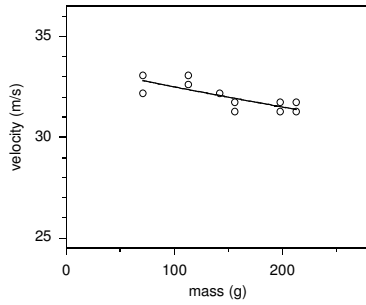

Participant 7

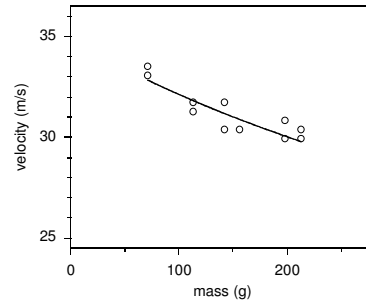

Participant 3

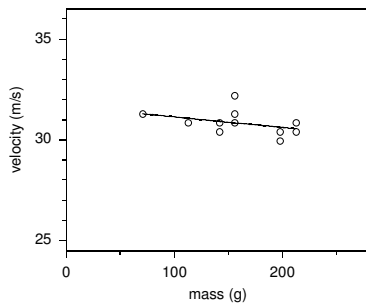

Participant 8

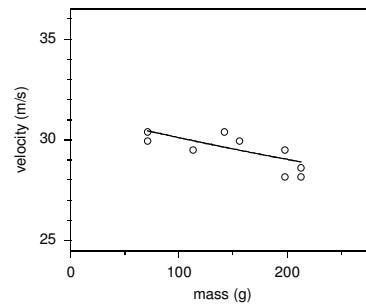

Participant 4

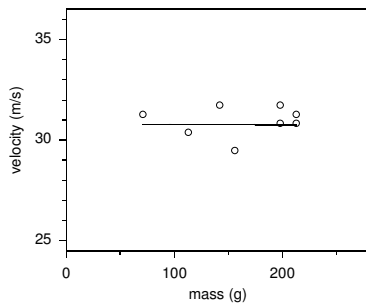

Participant 9

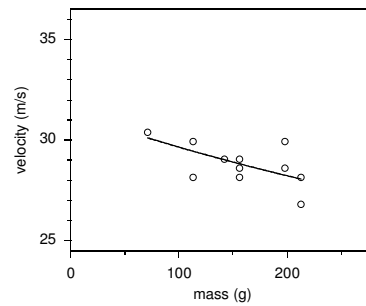

Participant 5

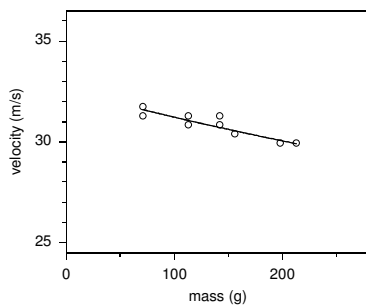

Participant 10

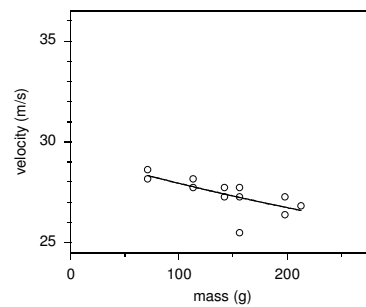

## BOWLING MODEL FITS TO BALL SPEED vs BALL WEIGHT DATA

### Bowling Model with one fitted variable: Shoulder Torque (T)

( $m_{\text{arm}} = 5\% M$ ;  $\Delta\theta = 270^\circ$ ;  $v_{\text{run-up}} = 5 \text{ m/s}$ )

| Participant | Cricket Bowling Model 1                         |       |               |        |
|-------------|-------------------------------------------------|-------|---------------|--------|
|             | Shoulder torque<br>$T \text{ (N}\cdot\text{m)}$ | $r^2$ | RMSD<br>(m/s) | AICc   |
| 1           | 122 ± 7                                         | 0.18  | 5.6           | 16.57  |
| 2           | 132 ± 2                                         | 0.59  | 1.4           | -19.77 |
| 3           | 122 ± 2                                         | 0.16  | 1.8           | -13.19 |
| 4           | 130 ± 5                                         | 0.14  | 3.2           | 1.80   |
| 5           | 125 ± 2                                         | 0.72  | 1.1           | -24.81 |
| 6           | 120 ± 4                                         | 0.05  | 3.0           | 0.67   |
| 7           | 112 ± 3                                         | 0.49  | 2.8           | -1.10  |
| 8           | 103 ± 3                                         | 0.42  | 2.1           | -8.86  |
| 9           | 88 ± 3                                          | 0.36  | 2.9           | -0.81  |
| 10          | 93 ± 3                                          | 0.38  | 2.3           | -6.81  |

### Bowling Model with two fitted variables: Shoulder Torque (T) and Arm Mass ( $m_{\text{arm}}$ )

( $\Delta\theta = 270^\circ$ ;  $v_{\text{run-up}} = 5 \text{ m/s}$ )

| Participant | Cricket Bowling Model 2                         |                                           |       |               |        |
|-------------|-------------------------------------------------|-------------------------------------------|-------|---------------|--------|
|             | Shoulder torque<br>$T \text{ (N}\cdot\text{m)}$ | Arm mass<br>$m_{\text{arm}} \text{ (kg)}$ | $r^2$ | RMSD<br>(m/s) | AICc   |
| 1           | 60 ± 60                                         | 1.9 ± 2.1                                 | 0.24  | 5.4           | 19.09  |
| 2           | 100 ± 40                                        | 3.6 ± 1.7                                 | 0.59  | 1.3           | -17.13 |
| 3           | 180 ± 190                                       | 7.0 ± 7.9                                 | 0.21  | 1.7           | -10.39 |
| 4           | 5000 ± 150000                                   | 210 ± 6200                                | <0.01 | 3.0           | 3.53   |
| 5           | 80 ± 20                                         | 2.8 ± 0.7                                 | 0.86  | 0.8           | -30.01 |
| 6           | 190 ± 360                                       | 7.3 ± 14.2                                | 0.08  | 3.0           | 3.72   |
| 7           | 40 ± 10                                         | 1.4 ± 0.5                                 | 0.78  | 1.9           | -8.42  |
| 8           | 70 ± 40                                         | 3.0 ± 2.0                                 | 0.46  | 2.0           | -6.32  |
| 9           | 50 ± 30                                         | 2.1 ± 1.5                                 | 0.44  | 2.7           | 0.94   |
| 10          | 50 ± 30                                         | 2.3 ± 1.5                                 | 0.49  | 2.1           | -5.97  |

## BOWLING MODEL FITS TO BALL SPEED vs BALL WEIGHT DATA

### Relative probability of model

| Participant | Model with one<br>fitted variable:<br>$T$ (%) | Model with two<br>fitted variables:<br>$T$ and $m_{arm}$ (%) |
|-------------|-----------------------------------------------|--------------------------------------------------------------|
| 1           | 78                                            | 22                                                           |
| 2           | 79                                            | 21                                                           |
| 3           | 80                                            | 20                                                           |
| 4           | 70                                            | 30                                                           |
| 5           | 7                                             | 93                                                           |
| 6           | 82                                            | 18                                                           |
| 7           | 3                                             | 97                                                           |
| 8           | 78                                            | 22                                                           |
| 9           | 71                                            | 29                                                           |
| 10          | 60                                            | 40                                                           |

### Linear Fit

| Participant | Linear Fit                                           |       |               |        |
|-------------|------------------------------------------------------|-------|---------------|--------|
|             | Rate of decrease<br>in ball speed<br>(m/s per 100 g) | $r^2$ | RMSD<br>(m/s) | AICc   |
| 1           | $1.8 \pm 1.8$                                        | 0.23  | 5.4           | 19.26  |
| 2           | $1.0 \pm 0.4$                                        | 0.61  | 1.3           | -17.14 |
| 3           | $0.5 \pm 0.6$                                        | 0.21  | 1.7           | -10.41 |
| 4           | $0.0 \pm 1.0$                                        | <0.01 | 3.0           | 3.53   |
| 5           | $1.2 \pm 0.3$                                        | 0.86  | 0.8           | -30.33 |
| 6           | $0.5 \pm 1.0$                                        | 0.08  | 3.0           | 3.71   |
| 7           | $2.1 \pm 0.6$                                        | 0.75  | 2.0           | -6.58  |
| 8           | $1.1 \pm 0.6$                                        | 0.48  | 2.0           | -6.78  |
| 9           | $1.4 \pm 0.9$                                        | 0.44  | 2.7           | 1.08   |
| 10          | $1.2 \pm 0.7$                                        | 0.48  | 2.1           | -5.75  |
