# Supplementary material for: Effect of Ball Weight on Speed, Accuracy, and Mechanics in Cricket Fast Bowling
Source: MDPI journal article supplement (doi:10.3390/sports5010018), 2017-02-28
Supplement: s1 [file s1]

BALL SPEED

Participant 1

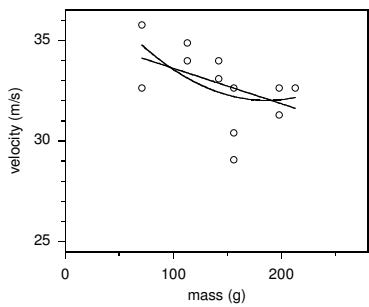

Participant 6

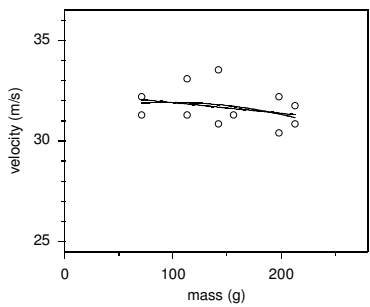

Participant 2

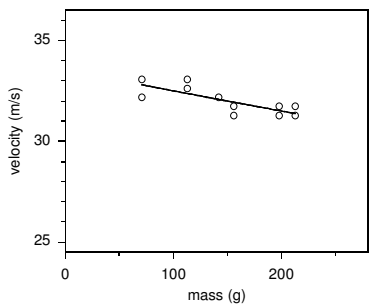

Participant 7

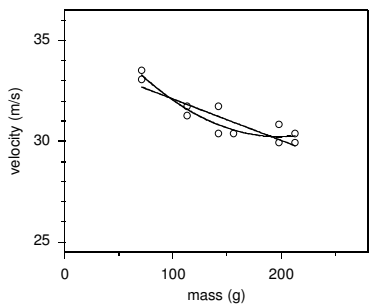

Participant 3

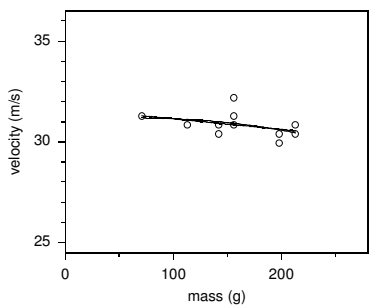

Participant 8

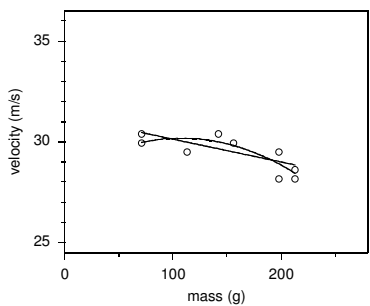

Participant 4

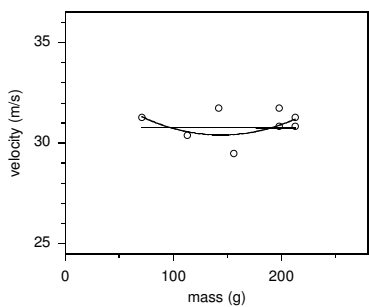

Participant 9

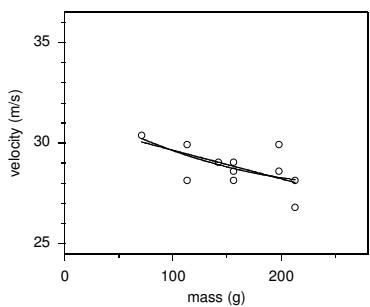

Participant 5

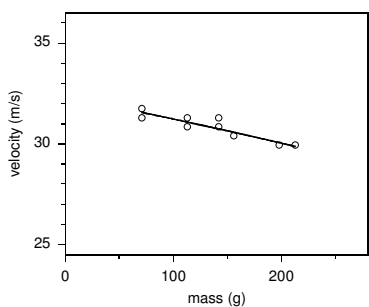

Participant 10

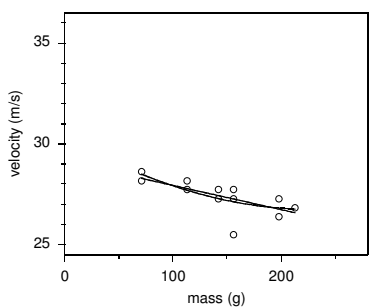

ACCURACY

Participant 1

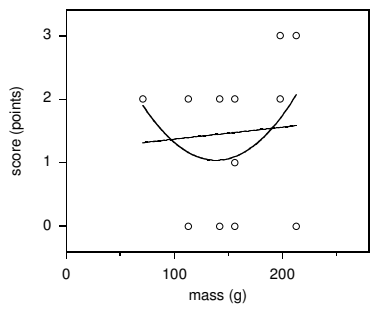

Participant 6

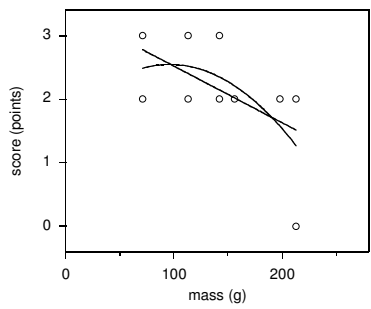

Participant 2

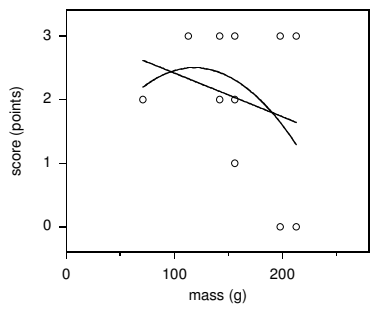

Participant 7

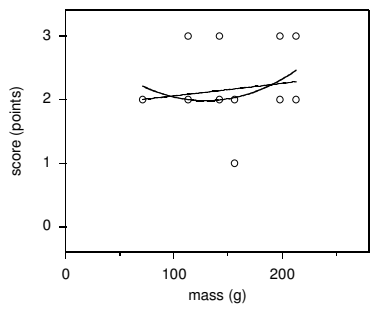

Participant 3

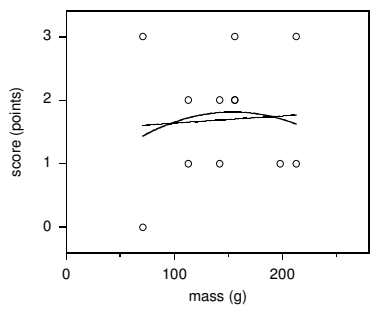

Participant 8

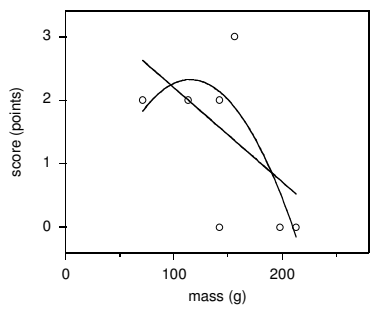

Participant 4

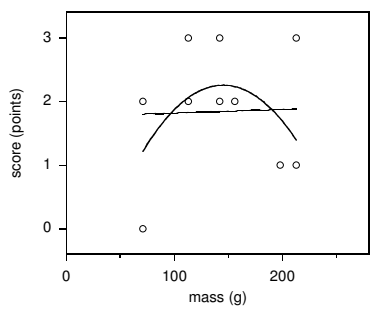

Participant 9

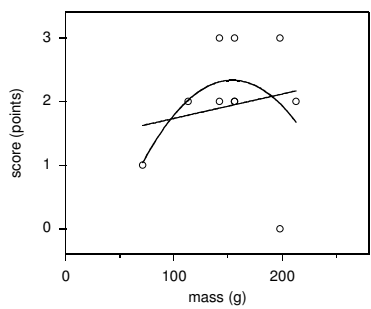

Participant 5

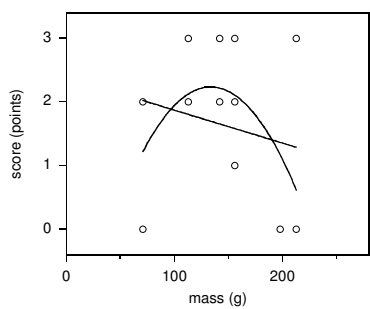

Participant 10

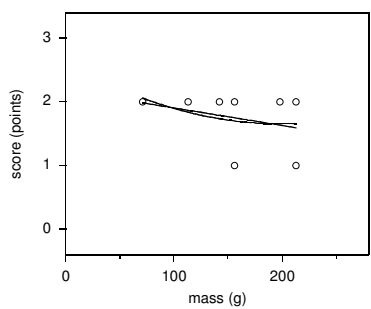

BACK FOOT ANGLE \*

Participant 1

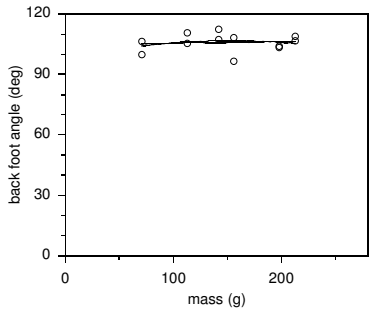

Participant 6

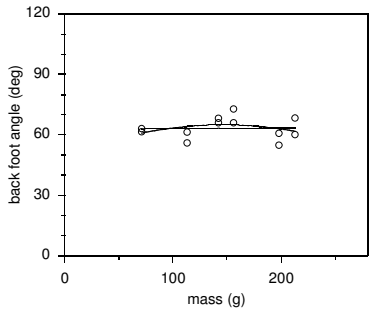

Participant 2

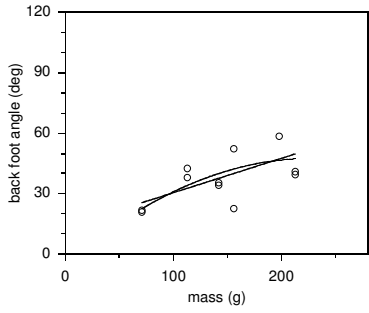

Participant 7

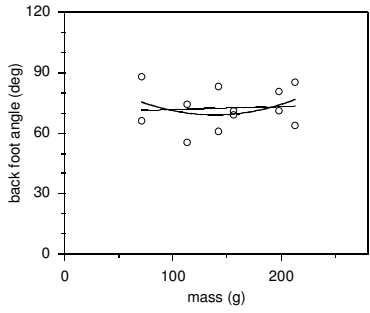

Participant 3

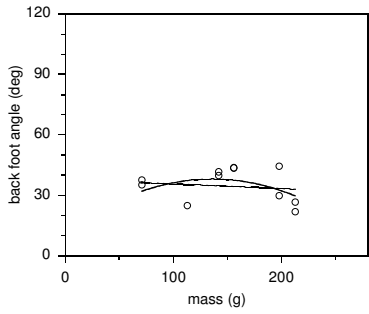

Participant 8

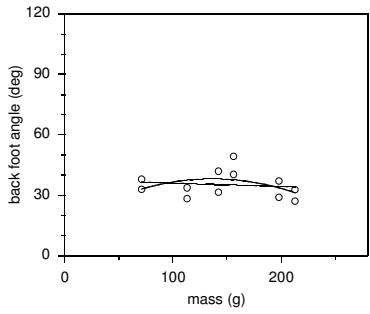

Participant 4

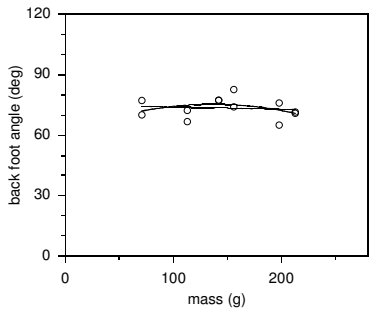

Participant 9

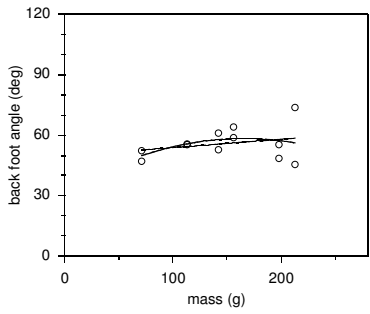

Participant 5

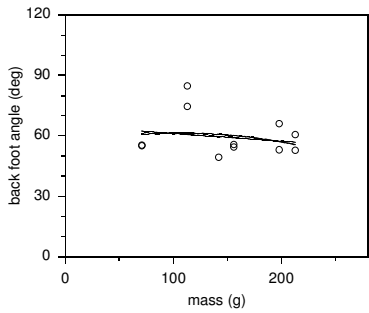

Participant 10

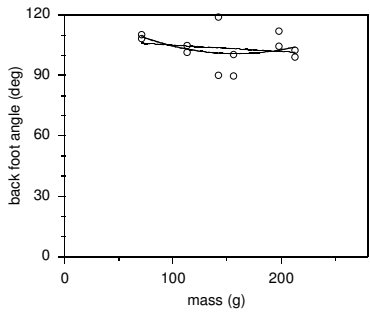

\* Foot angle measured in clockwise direction

FRONT FOOT ANGLE \*

Participant 1

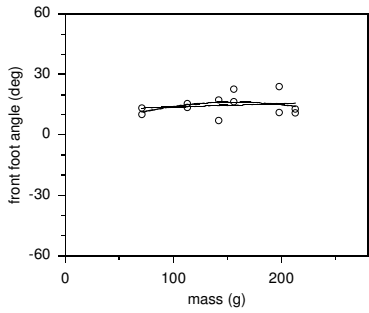

Participant 6

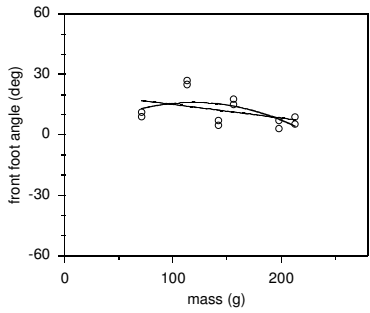

Participant 2

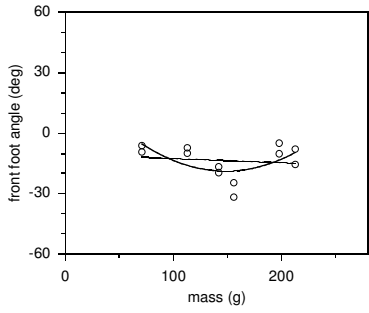

Participant 7

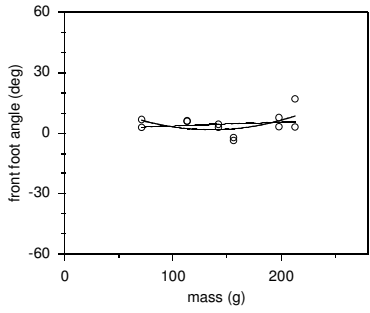

Participant 3

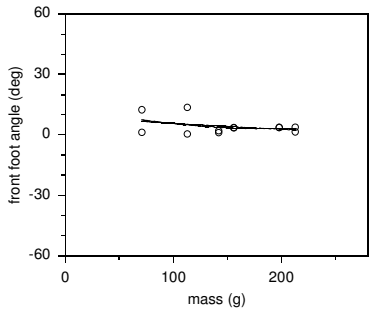

Participant 8

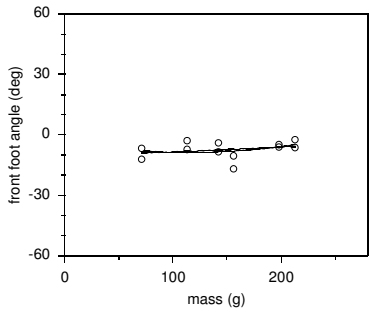

Participant 4

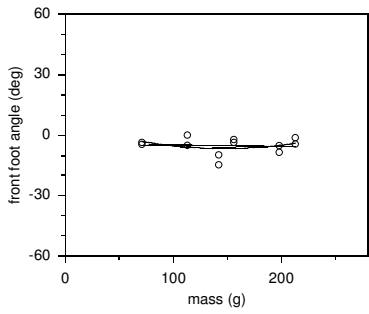

Participant 9

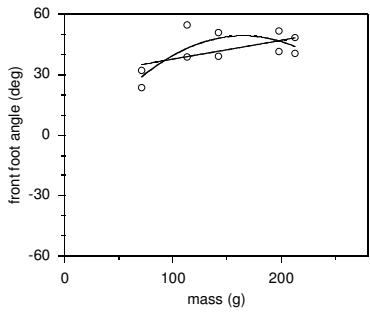

Participant 5

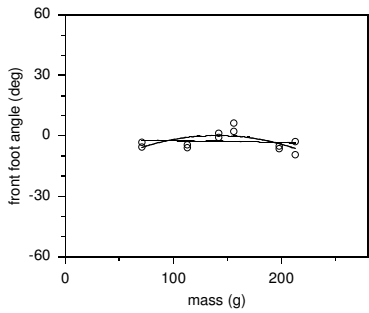

Participant 10

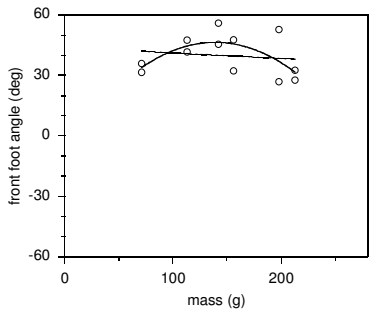

\* Foot angle measured in clockwise direction

KNEE ANGLE (BACK FOOT CONTACT)

Participant 1

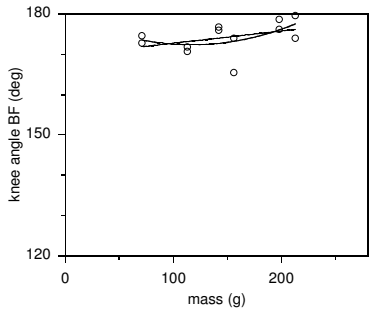

Participant 6

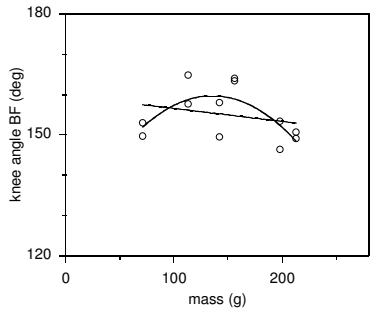

Participant 2

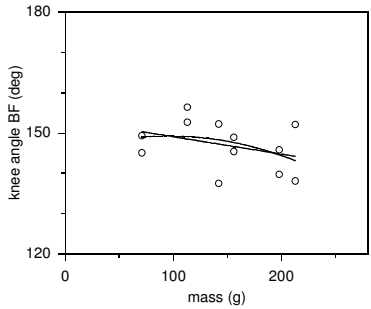

Participant 7

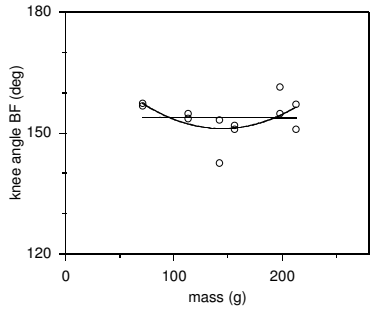

Participant 3

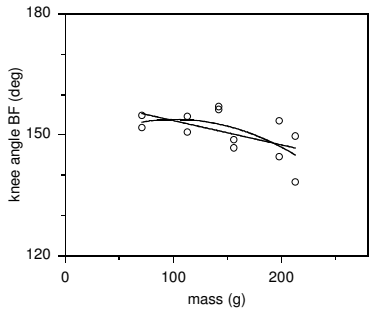

Participant 8

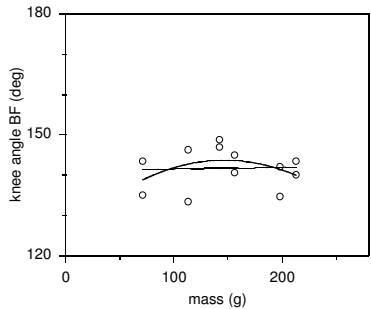

Participant 4

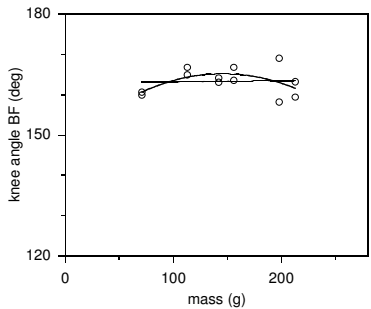

Participant 9

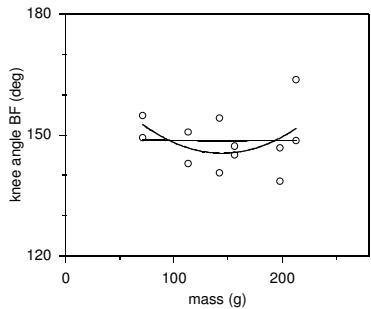

Participant 5

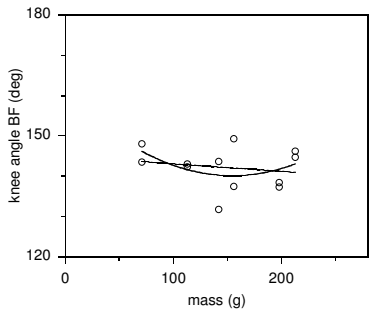

Participant 10

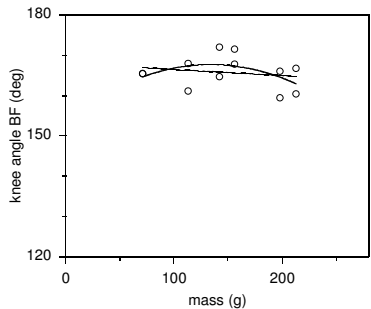

## KNEE ANGLE (FRONT FOOT CONTACT)

Participant 1

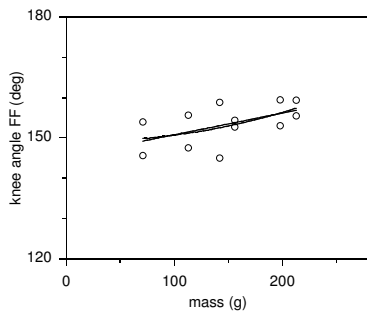

Participant 6

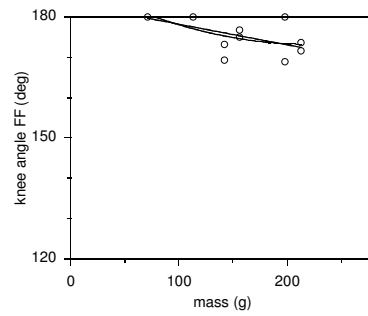

Participant 2

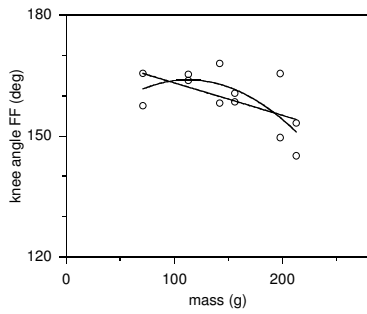

Participant 7

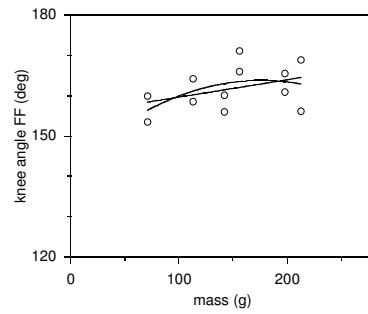

Participant 3

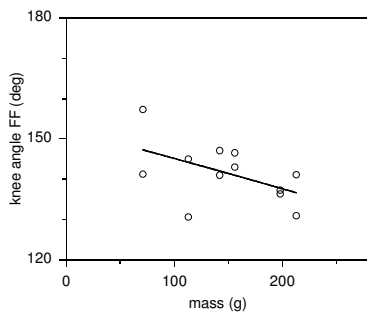

Participant 8

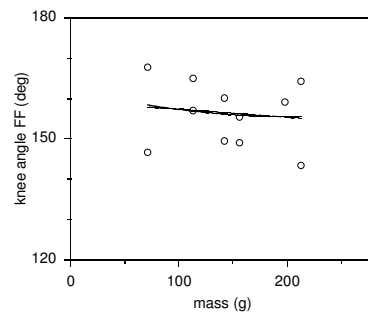

Participant 4

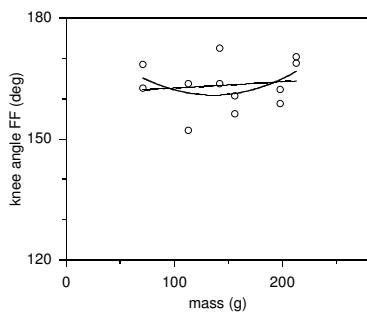

Participant 9

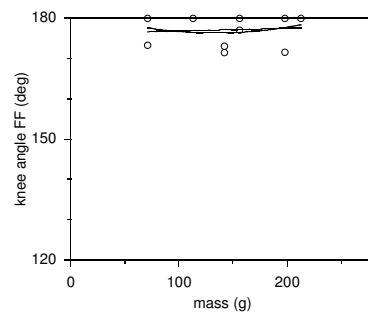

Participant 5

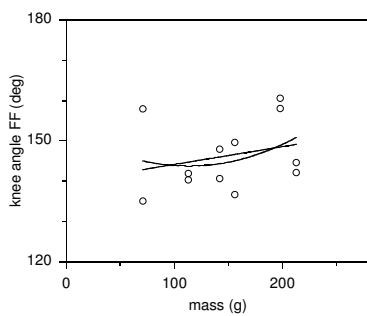

Participant 10

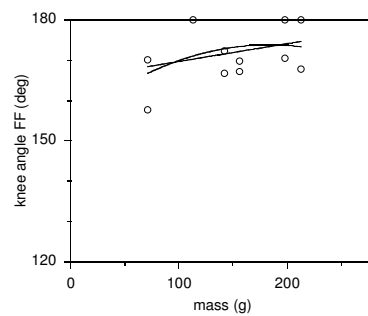

KNEE ANGLE (RELEASE)

Participant 1

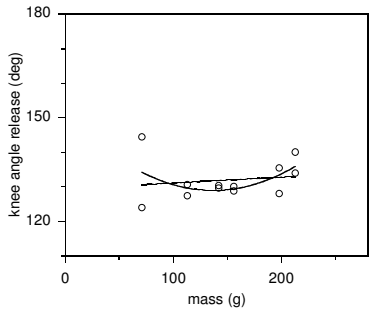

Participant 6

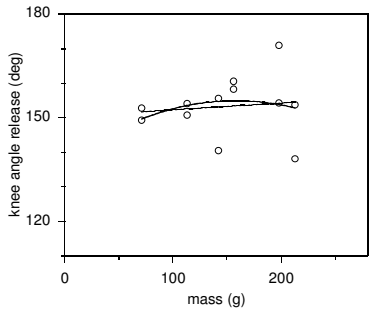

Participant 2

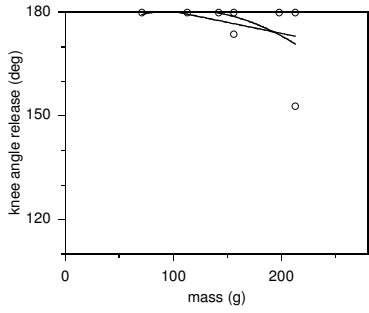

Participant 7

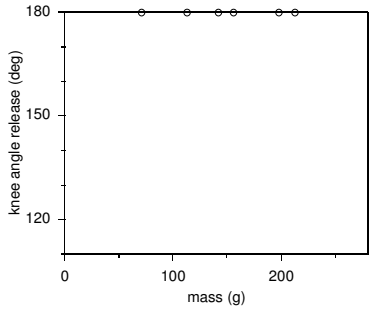

Participant 3

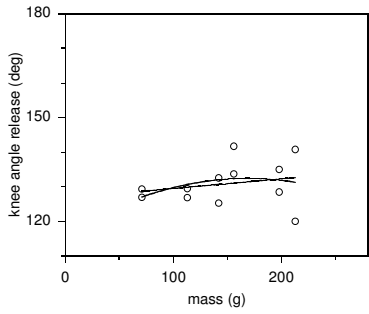

Participant 8

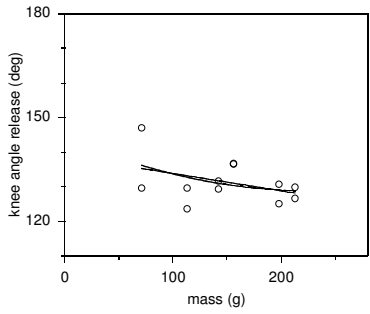

Participant 4

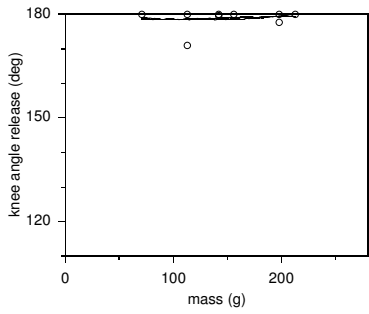

Participant 9

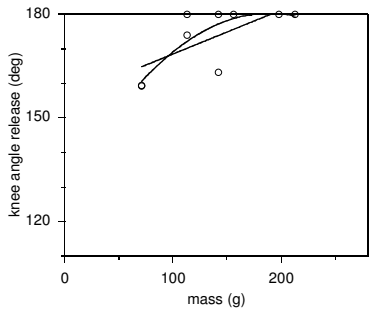

Participant 5

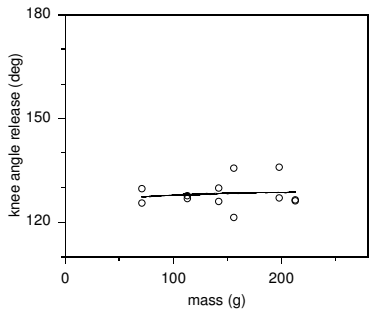

Participant 10

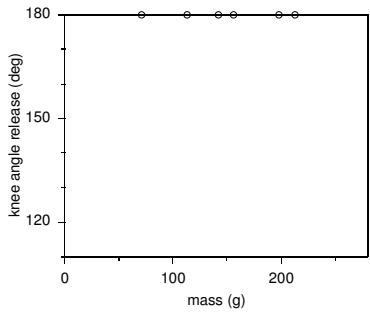

SHOULDER ANGLE X (BACK FOOT CONTACT)

Participant 1

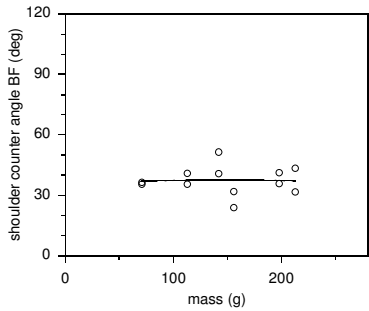

Participant 6

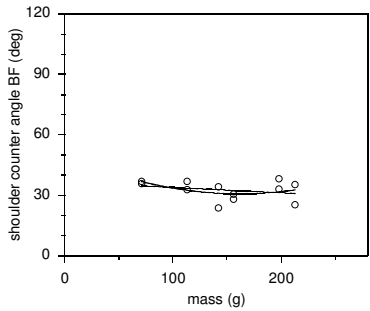

Participant 2

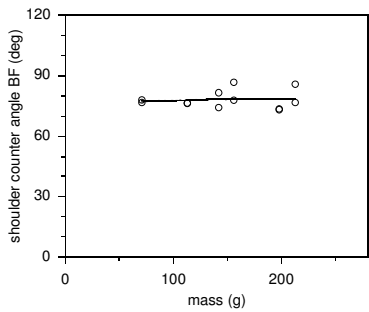

Participant 7

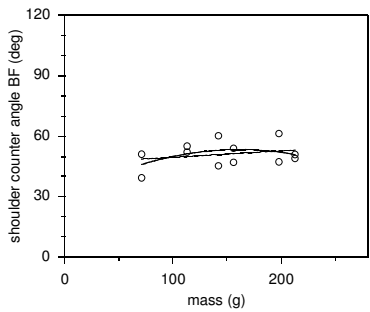

Participant 3

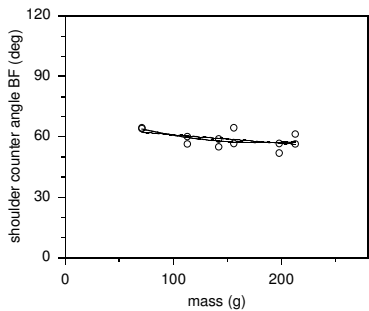

Participant 8

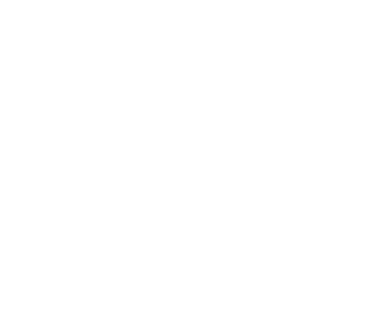

Participant 4

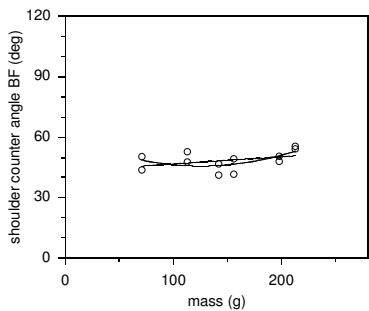

Participant 9

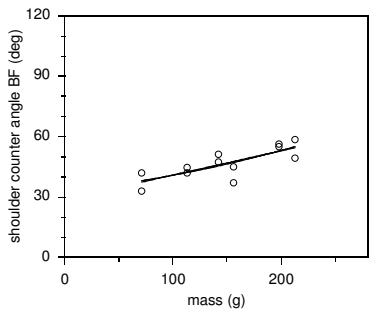

Participant 5

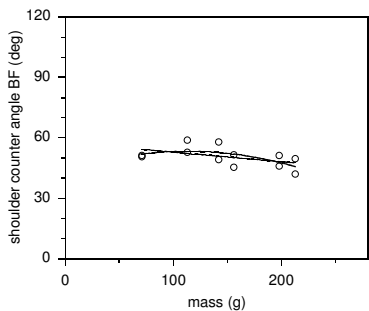

Participant 10

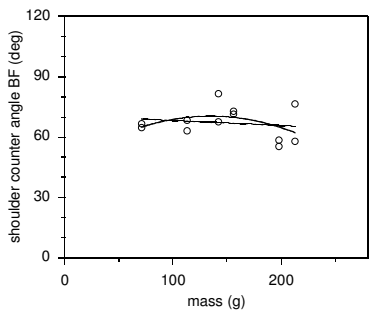



SHOULDER ANGLE X (FRONT FOOT CONTACT)

Participant 1

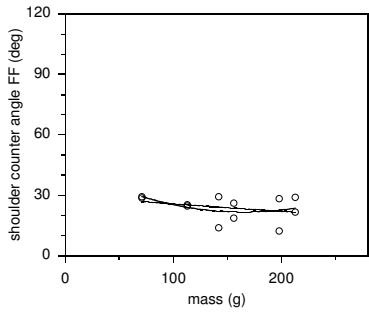

Participant 6

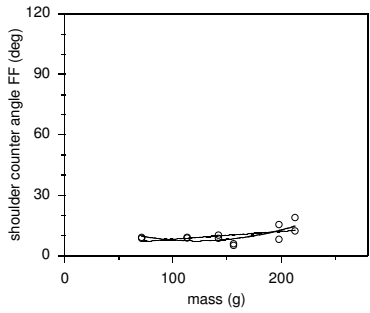

Participant 2

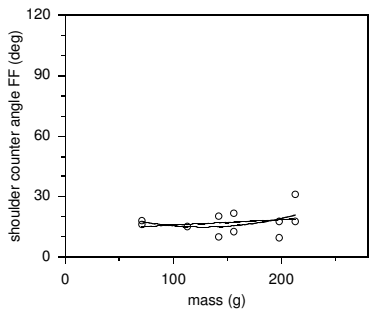

Participant 7

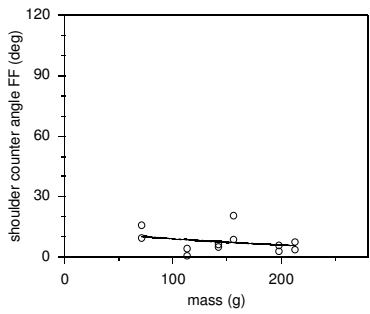

Participant 3

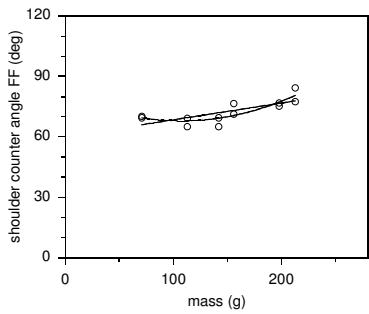

Participant 8

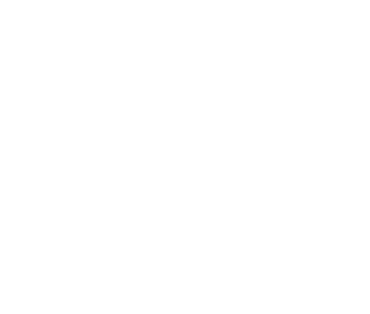

Participant 4

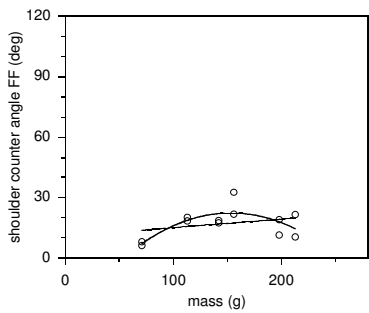

Participant 9

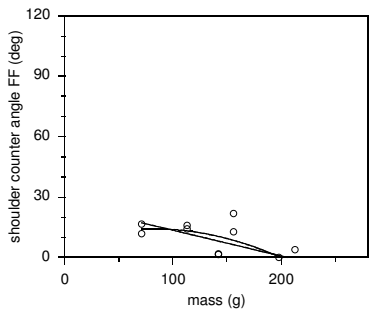

Participant 5

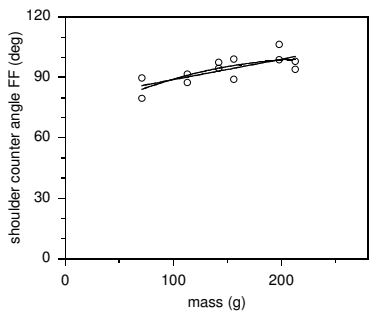

Participant 10

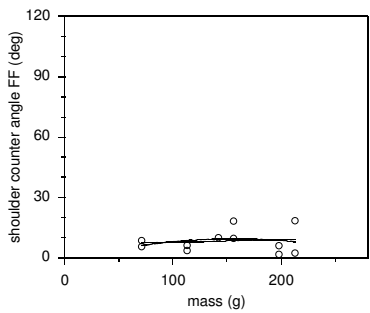

## RELATIVE PROBABILITY OF LINEAR FIT OR U-SHAPE FIT

| <b>Ball Speed</b>     |                    |                                           |                                            |                           |
|-----------------------|--------------------|-------------------------------------------|--------------------------------------------|---------------------------|
| <b>Training group</b> | <b>Participant</b> | <b>Probability<br/>Linear Fit<br/>(%)</b> | <b>Probability<br/>U-Shape Fit<br/>(%)</b> | <b>Evidence<br/>Ratio</b> |
| Intervention          | 1                  | 83                                        | 17                                         | 4.9                       |
|                       | 2                  | 90                                        | 10                                         | 8.7                       |
|                       | 3                  | 88                                        | 12                                         | 7.4                       |
|                       | 4                  | 68                                        | 32                                         | 2.1                       |
|                       | 5                  | 89                                        | 11                                         | 8.1                       |
| Control               | 6                  | 88                                        | 12                                         | 7.6                       |
|                       | 7                  | 6                                         | 94                                         | 0.1                       |
|                       | 8                  | 30                                        | 70                                         | 0.4                       |
|                       | 9                  | 88                                        | 12                                         | 7.4                       |
|                       | 10                 | 85                                        | 15                                         | 5.7                       |

| <b>Accuracy</b>       |                    |                                           |                                            |                           |
|-----------------------|--------------------|-------------------------------------------|--------------------------------------------|---------------------------|
| <b>Training group</b> | <b>Participant</b> | <b>Probability<br/>Linear Fit<br/>(%)</b> | <b>Probability<br/>U-Shape Fit<br/>(%)</b> | <b>Evidence<br/>Ratio</b> |
| Intervention          | 1                  | 77                                        | 23                                         | 3.3                       |
|                       | 2                  | 84                                        | 16                                         | 5.1                       |
|                       | 3                  | 89                                        | 11                                         | 7.3                       |
|                       | 4                  | 64                                        | 36                                         | 1.8                       |
|                       | 5                  | 64                                        | 36                                         | 1.8                       |
| Control               | 6                  | 80                                        | 20                                         | 1.4                       |
|                       | 7                  | 86                                        | 14                                         | 6.3                       |
|                       | 8                  | 47                                        | 53                                         | 0.9                       |
|                       | 9                  | 58                                        | 42                                         | 1.4                       |
|                       | 10                 | 89                                        | 11                                         | 7.8                       |

## RELATIVE PROBABILITY OF LINEAR FIT OR U-SHAPE FIT

| Back Foot Angle |             |                                  |                                   |                   |
|-----------------|-------------|----------------------------------|-----------------------------------|-------------------|
| Training group  | Participant | Probability<br>Linear Fit<br>(%) | Probability<br>U-Shape Fit<br>(%) | Evidence<br>Ratio |
| Intervention    | 1           | 90                               | 10                                | 8.7               |
|                 | 2           | 89                               | 11                                | 7.7               |
|                 | 3           | 80                               | 20                                | 4.1               |
|                 | 4           | 83                               | 17                                | 4.8               |
|                 | 5           | 91                               | 9                                 | 9.8               |
| Control         | 6           | 85                               | 15                                | 5.7               |
|                 | 7           | 86                               | 14                                | 5.9               |
|                 | 8           | 78                               | 22                                | 3.5               |
|                 | 9           | 87                               | 13                                | 6.5               |
|                 | 10          | 86                               | 14                                | 6.1               |

| Front Foot Angle |             |                                  |                                   |                   |
|------------------|-------------|----------------------------------|-----------------------------------|-------------------|
| Training group   | Participant | Probability<br>Linear Fit<br>(%) | Probability<br>U-Shape Fit<br>(%) | Evidence<br>Ratio |
| Intervention     | 1           | 85                               | 15                                | 5.7               |
|                  | 2           | 39                               | 61                                | 0.6               |
|                  | 3           | 90                               | 10                                | 9.1               |
|                  | 4           | 84                               | 16                                | 5.3               |
|                  | 5           | 74                               | 26                                | 2.9               |
| Control          | 6           | 77                               | 23                                | 3.3               |
|                  | 7           | 66                               | 34                                | 1.9               |
|                  | 8           | 89                               | 11                                | 8.1               |
|                  | 9           | 88                               | 12                                | 7.4               |
|                  | 10          | 39                               | 61                                | 0.6               |

## RELATIVE PROBABILITY OF LINEAR FIT OR U-SHAPE FIT

### Knee Angle (Back Foot Contact)

| Training group | Participant | Probability<br>Linear Fit<br>(%) | Probability<br>U-Shape Fit<br>(%) | Evidence<br>Ratio |
|----------------|-------------|----------------------------------|-----------------------------------|-------------------|
| Intervention   | 1           | 82                               | 18                                | 4.6               |
|                | 2           | 90                               | 10                                | 8.8               |
|                | 3           | 82                               | 18                                | 4.7               |
|                | 4           | 56                               | 44                                | 1.3               |
|                | 5           | 80                               | 20                                | 4.0               |
| Control        | 6           | 24                               | 76                                | 0.3               |
|                | 7           | 56                               | 44                                | 1.3               |
|                | 8           | 81                               | 20                                | 4.3               |
|                | 9           | 76                               | 24                                | 3.2               |
|                | 10          | 75                               | 25                                | 2.9               |

### Knee Angle (Front Foot Contact)

| Training group | Participant | Probability<br>Linear Fit<br>(%) | Probability<br>U-Shape Fit<br>(%) | Evidence<br>Ratio |
|----------------|-------------|----------------------------------|-----------------------------------|-------------------|
| Intervention   | 1           | 91                               | 9                                 | 9.7               |
|                | 2           | 66                               | 34                                | 1.9               |
|                | 3           | 91                               | 9                                 | 10.6              |
|                | 4           | 81                               | 19                                | 4.3               |
|                | 5           | 89                               | 11                                | 8.4               |
| Control        | 6           | 89                               | 11                                | 8.2               |
|                | 7           | 86                               | 14                                | 6.1               |
|                | 8           | 91                               | 9                                 | 10.4              |
|                | 9           | 89                               | 11                                | 8.3               |
|                | 10          | 90                               | 10                                | 8.5               |

### Knee Angle (Release)

| Training group | Participant | Probability<br>Linear Fit<br>(%) | Probability<br>U-Shape Fit<br>(%) | Evidence<br>Ratio |
|----------------|-------------|----------------------------------|-----------------------------------|-------------------|
| Intervention   | 1           | 69                               | 31                                | 2.2               |
|                | 2           | 86                               | 14                                | 6.2               |
|                | 3           | 89                               | 11                                | 8.2               |
|                | 4           | 89                               | 11                                | 8.4               |
|                | 5           | 91                               | 9                                 | 10.3              |
| Control        | 6           | 90                               | 10                                | 8.6               |
|                | 7           | 100                              | 0                                 | >100              |
|                | 8           | 100                              | 0                                 | >100              |
|                | 9           | 59                               | 41                                | 1.4               |
|                | 10          | 100                              | 0                                 | >100              |

## RELATIVE PROBABILITY OF LINEAR FIT OR U-SHAPE FIT

### Shoulder Angle (Back Foot Contact)

| Training group | Participant | Probability<br>Linear Fit<br>(%) | Probability<br>U-Shape Fit<br>(%) | Evidence<br>Ratio |
|----------------|-------------|----------------------------------|-----------------------------------|-------------------|
| Intervention   | 1           | 91                               | 9                                 | 10.4              |
|                | 2           | 91                               | 9                                 | 10.3              |
|                | 3           | 82                               | 18                                | 4.6               |
|                | 4           | 65                               | 35                                | 1.8               |
|                | 5           | 77                               | 23                                | 3.4               |
| Control        | 6           | 82                               | 18                                | 4.6               |
|                | 7           | 84                               | 16                                | 5.1               |
|                | 8           | –                                | –                                 | –                 |
|                | 9           | 91                               | 9                                 | 10.4              |
|                | 10          | 80                               | 20                                | 4.0               |

### Shoulder Angle (Front Foot Contact)

| Training group | Participant | Probability<br>Linear Fit<br>(%) | Probability<br>U-Shape Fit<br>(%) | Evidence<br>Ratio |
|----------------|-------------|----------------------------------|-----------------------------------|-------------------|
| Intervention   | 1           | 84                               | 16                                | 5.1               |
|                | 2           | 64                               | 36                                | 1.8               |
|                | 3           | 25                               | 75                                | 0.3               |
|                | 4           | 12                               | 88                                | 0.1               |
|                | 5           | 86                               | 14                                | 6.2               |
| Control        | 6           | 47                               | 53                                | 0.9               |
|                | 7           | 91                               | 9                                 | 10.3              |
|                | 8           | –                                | –                                 | –                 |
|                | 9           | 85                               | 15                                | 5.6               |
|                | 10          | 89                               | 11                                | 8.4               |

## GRADIENT OF LINEAR FIT

| Ball Speed     |             |                          |         |
|----------------|-------------|--------------------------|---------|
| Training group | Participant | Gradient<br>(m/s per kg) | ±90% CI |
| Intervention   | 1           | -18                      | 18      |
|                | 2           | -10                      | 4       |
|                | 3           | -5                       | 6       |
|                | 4           | 0                        | 10      |
|                | 5           | -12                      | 3       |
| Control        | 6           | -5                       | 10      |
|                | 7           | -21                      | 6       |
|                | 8           | -11                      | 6       |
|                | 9           | -14                      | 9       |
|                | 10          | -12                      | 7       |

| Accuracy       |             |                             |         |
|----------------|-------------|-----------------------------|---------|
| Training group | Participant | Gradient<br>(points per kg) | ±90% CI |
| Intervention   | 1           | 2                           | 13      |
|                | 2           | -7                          | 12      |
|                | 3           | 1                           | 11      |
|                | 4           | 1                           | 10      |
|                | 5           | -5                          | 14      |
| Control        | 6           | -9                          | 7       |
|                | 7           | 2                           | 8       |
|                | 8           | -15                         | 12      |
|                | 9           | 4                           | 13      |
|                | 10          | -3                          | 5       |

## GRADIENT OF LINEAR FIT

| Back Foot Angle |             |                          |         |
|-----------------|-------------|--------------------------|---------|
| Training group  | Participant | Gradient<br>(deg per kg) | ±90% CI |
| Intervention    | 1           | 7                        | 51      |
|                 | 2           | 171                      | 112     |
|                 | 3           | -23                      | 95      |
|                 | 4           | -11                      | 57      |
|                 | 5           | -38                      | 120     |
| Control         | 6           | 3                        | 59      |
|                 | 7           | 15                       | 116     |
|                 | 8           | -18                      | 73      |
|                 | 9           | 41                       | 87      |
|                 | 10          | -32                      | 94      |

| Front Foot Angle |             |                          |         |
|------------------|-------------|--------------------------|---------|
| Training group   | Participant | Gradient<br>(deg per kg) | ±90% CI |
| Intervention     | 1           | 17                       | 56      |
|                  | 2           | -21                      | 93      |
|                  | 3           | -30                      | 46      |
|                  | 4           | -4                       | 46      |
|                  | 5           | -13                      | 32      |
| Control          | 6           | -67                      | 81      |
|                  | 7           | 20                       | 58      |
|                  | 8           | 23                       | 46      |
|                  | 9           | 88                       | 97      |
|                  | 10          | -28                      | 112     |

## GRADIENT OF LINEAR FIT

### Knee Angle (Back Foot Contact)

| Training group | Participant | Gradient<br>(deg per kg) | ±90% CI |
|----------------|-------------|--------------------------|---------|
| Intervention   | 1           | 30                       | 40      |
|                | 2           | -43                      | 65      |
|                | 3           | -60                      | 51      |
|                | 4           | 3                        | 38      |
|                | 5           | -19                      | 56      |
| Control        | 6           | -32                      | 71      |
|                | 7           | -1                       | 53      |
|                | 8           | 4                        | 48      |
|                | 9           | -2                       | 78      |
|                | 10          | -15                      | 44      |

### Knee Angle (Front Foot Contact)

| Training group | Participant | Gradient<br>(deg per kg) | ±90% CI |
|----------------|-------------|--------------------------|---------|
| Intervention   | 1           | 54                       | 51      |
|                | 2           | -81                      | 66      |
|                | 3           | -75                      | 40      |
|                | 4           | 16                       | 68      |
|                | 5           | 44                       | 95      |
| Control        | 6           | -51                      | 40      |
|                | 7           | 43                       | 57      |
|                | 8           | -20                      | 88      |
|                | 9           | 7                        | 42      |
|                | 10          | 44                       | 76      |

### Knee Angle (Release)

| Training group | Participant | Gradient<br>(deg per kg) | ±90% CI |
|----------------|-------------|--------------------------|---------|
| Intervention   | 1           | 17                       | 70      |
|                | 2           | -64                      | 82      |
|                | 3           | 28                       | 70      |
|                | 4           | 8                        | 29      |
|                | 5           | 9                        | 47      |
| Control        | 6           | 19                       | 97      |
|                | 7           | 0                        | 0       |
|                | 8           | -50                      | 66      |
|                | 9           | 127                      | 68      |
|                | 10          | 0                        | 0       |



## GRADIENT OF LINEAR FIT

### Shoulder Angle (Back Foot Contact)

| Training group | Participant | Gradient<br>(deg per kg) | ±90% CI |
|----------------|-------------|--------------------------|---------|
| Intervention   | 1           | 1                        | 79      |
|                | 2           | 8                        | 50      |
|                | 3           | -42                      | 39      |
|                | 4           | 36                       | 49      |
|                | 5           | -48                      | 48      |
| Control        | 6           | -26                      | 52      |
|                | 7           | 31                       | 68      |
|                | 8           | -                        | -       |
|                | 9           | 121                      | 55      |
|                | 10          | -25                      | 88      |

### Shoulder Angle (Front Foot Contact)

| Training group | Participant | Gradient<br>(deg per kg) | ±90% CI |
|----------------|-------------|--------------------------|---------|
| Intervention   | 1           | -37                      | 66      |
|                | 2           | 27                       | 67      |
|                | 3           | 83                       | 44      |
|                | 4           | 43                       | 79      |
|                | 5           | 102                      | 53      |
| Control        | 6           | 39                       | 38      |
|                | 7           | -31                      | 62      |
|                | 8           | -                        | -       |
|                | 9           | -128                     | 79      |
|                | 10          | 12                       | 62      |
