# Supplementary material for: Effect of Ball Weight on Speed, Accuracy, and Mechanics in Cricket Fast Bowling
Source: Sports (Basel). 2017 Feb 28;5(1):18. doi: 10.3390/sports5010018 (PMC5969017; doi:10.3390/sports5010018)
Supplement: Supplementary file 1 [file sports-05-00018-s001.zip]

Archive with 4 entries (4 files):
- Supplementary Data 2 (Bowling Model Fits).pdf
- Supplementary Data 3 (After).pdf
- Supplementary Data 4 (Effect of Training).pdf
- Supplementary Data 1 (Ball Weight).pdf
